# Supplementary material for: Data assimilation using adaptive, non-conservative, moving meshmodels
Source: Copernicus journal article supplement (doi:10.5194/npg-2019-9), 2019-03-11
Supplement: Supplementary file [file npg-2019-9-AC1-supplement.pdf]

## **Response to the referees: “Data assimilation using adaptive, non-conservative, moving mesh models”**

### Common Response to all Anonymous Referees

We thank all three anonymous referees for their careful review and affirmative comments on our manuscript which encourages us for further research on the data assimilation using adaptive moving mesh models. There are three main criticisms common from all of the referees: a) novelty of our work compared to Du et al., (2016), b) extensive discussion about neXtSIM c) concerns about the accuracy of our mapping strategy. Below are our point-by-point responses to all referees. Referee’ comments are typed in *italic* fonts. Titles are underlined. We also enclose a version of the manuscript showing the differences with respect to the initially submitted version.

### Response to Anonymous Referee #1

1. *The authors repeatedly mentioned the Lagrangian sea-ice model neXtSIM. I understand that the current work is motivated by a long range research effort aimed at developing suitable EnKF strategies for the neXtSIM. The neXtSIM model is solved on a 2-dimensional unstructured triangular adaptive moving mesh. But the current work only proposed the 1D remeshing procedure and 1D mapping method to the fixed reference mesh, and tested with 1D models. I can’t understand why the authors gave such detailed introductions on the neXtSIM model and the remeshing on the triangular elements in section 1.3. As far as I understood, it seems that no substantial progress has been made to the data assimilation with 2D models using non-conservative adaptive moving mesh. If neither the method nor the experiment involves the neXtSIM model, it looks strange to describe it in the introduction.*

As the referee appreciated, this study is a first step of our long-term planned research efforts which include the extension to 2D cases, particularly to neXtSIM. We designed each step of the methodology presented in this manuscript to be used as a testbed for further investigations related to the issues of data assimilation using neXtSIM, even though not all aspects, for example the underlying model physics, satisfy the properties of neXtSIM. Therefore, we think it is necessary and legitimate to reveal which methodological and setup choices we adopt to emulate the scenario we will have to face in neXtSIM. It is worth to mention that we are currently conducting experimentation with neXtSIM using the methodology proposed in this manuscript; we hope to be able soon to share these new results with the community, with a reference to the present manuscript.

**Response to the referees: “Data assimilation using adaptive, non-conservative, moving mesh models”**

We nevertheless understand the Reviewer’s concern to address which we have added the following paragraph to the end of the Sec.1.3: “The specific DA methodology we develop for adaptive mesh problems is driven by the considerations of neXtSIM. The remeshing in neXtSIM, and the consequent change in the state vector’s dimension, is addressed in our assimilation scheme by the introduction of a reference mesh. The latter represents a common mesh for forming the error covariance matrix from the ensemble members. The question then arises as to whether this common mesh is used to propagate each individual ensemble member forward in time. From the viewpoint of neXtSIM, however, continuing with the reference mesh, common to all members, could throw away valuable physical information. In fact, the use of a Lagrangian solver in neXtSIM assures that the mesh configurations are naturally attuned to the physical evolution of the ice. For this reason, we make the critical methodological decision to map back to the meshes of the individual ensemble members after the assimilation step. The Lagrangian solver in the model is thus the primary determinant of the mesh configuration used in each forecast step. The reference mesh is only used in a temporary capacity to afford a consistent update at the assimilation step.”

And another one to the end of the Sec. 1.4 as: “In summary, Bonan et al. (2017) addresses the issues that arise with a Lagrangian solver without any remeshing, whereas the approach in Du et al. (2016) is developed for a model that has remeshing as part of its numerical algorithm, but uses another wise static mesh. The numerical solver underlying neXtSIM has both features and thus requires a methodology that differs from these two approaches. Our paper therefore goes beyond existent works in developing a scheme that addresses the case of a moving mesh with non-conservative mesh adaptation.”

*2. Page 4, Line 20. It seems that Du et al. (2016) have already interpolated each ensemble member onto a fixed reference mesh, and carried out analysis on that fixed reference mesh. Did they develop the method on a 2D mesh? What is the difference between this work and their work?*

Du et al. (2016) developed the methodology using a specific 3D unstructured adaptive mesh fluid model named *Fluidity*. The mesh used in Fluidity adapts to resolve multiscale dynamics optimally. They use a fixed, inhomogeneous, reference mesh which has higher resolution around the fixed observation locations in an attempt to reduce the representativeness error. It is called “observation mesh” and a conservative interpolation method called *supermeshing* is used to interpolate each adaptive mesh on it to compute the innovations. Their approach is efficient for high-dimensional models.

**Response to the referees: “Data assimilation using adaptive, non-conservative, moving mesh models”**

As we stated at the end of Sec. 1.2, our work is influenced by Du et al. (2016) and Bonan et al. (2017) and can be seen as a continuation of them in the context of EnKF studies using adaptive and/or non-conservative moving mesh models. Our models use moving mesh strategy as in Bonan et al. (2017) and have also a mesh adaptation process (remeshing) as in Du et al. (2016). We approach the problem using a fixed reference mesh similar to Du et al. (2016) study. However, one of our objectives is to reveal and exploit the connections between the fixed reference mesh properties and the criteria imposed to the adaptive moving meshes when constructing the computational model. The HR and LR cases presented in the manuscript use a high-/low-resolution fixed reference meshes, respectively, for the analysis. These meshes are not arbitrary but linked to the resolution of the adaptive moving meshes via the remeshing parameters  $\delta_1$  and  $\delta_2$ , i.e. high-resolution mesh is the highest possible resolution mesh (grid size  $\delta_1$ ) that an adaptive moving mesh can have, while low-resolution mesh is the lowest possible ( $\delta_2$ ). This is valid for any 1D models of the same type, yet we are currently using a similar approach in our ongoing study using neXtSIM in 2D.

Another different aspect of our work is the backward mapping of the analyzed state on to the adaptive moving meshes. We perform it to conserve the mesh structure formed by the dynamical evolution of the forecast models. This is probably not the case in Du et al. (2016) methodology because they seem to forward the ensemble after the analysis initialized on the fixed reference mesh, which is same for all the ensemble members.

Last but not least, we investigate also the impact of Lagrangian observations besides Eulerian ones. Therefore, we avoid using a fixed mesh designed for a predefined observation network. Linking the fixed reference mesh to adaptive moving meshes gives us the flexibility to use any model of the same class and any type of observation we want to assimilate.

We addressed the difference in our choice of the fixed reference mesh on p.10 l.28. Prompted by the Reviewer remark, we have modified the original paragraph as follows:

“The challenge in implementing an EnKF on an adaptive moving mesh model with remeshing is that the dimension of the state vector will be potentially different for each ensemble member. This is addressed by Du et al. (2016) in which the idea of a fixed reference mesh, called observation mesh, is introduced which has higher resolution around the predefined observations. We will adopt this approach here but introduce a new variant in utilizing meshes of different resolutions. In particular, we will work with a high- and a low-resolution mesh. We see these as representing the extremes which should bracket the possible results of using meshes of various resolutions. They are, respectively, associated with

**Response to the referees: “Data assimilation using adaptive, non-conservative, moving mesh models”**

the two tolerance parameters  $\delta_1$  and  $\delta_2$ , therefore linked directly to the mesh of the models while giving us the flexibility of assimilating any type of observations without prior information so as is generally the case in realistic applications. In addition, in our approach, the analyzed states are mapped back onto the adaptive moving meshes to preserve the mesh resolving fine scale structures generated by the dynamics of the models.”

3. Eq. (4) gives the condition for the validity of 1D mesh, and the remeshing procedure is introduced in section 3.2. The author indicates that the 1D mesh and remeshing retains the key features of the neXtSIM’s 2D mesh. Is that means the neXtSIM model itself has conditions for the validity of 2D mesh and the remeshing procedure? What is the condition for the validity of 2D mesh?

In neXtSIM, there is a remeshing process. Since it is a triangular 2D mesh model, the remeshing criteria are based on the internal angles and edge lengths of the triangular elements.

Internal angles of the triangular elements are queried to check whether remeshing is required every time step. The structure of the mesh used for a finite element method is crucial for the numerical stability of model. A triangular mesh with too distorted elements may come up with numerical inaccuracies. Therefore, in order to avoid such distorted elements a local remeshing is applied if an internal angle of an element is smaller than a given criterion as noted on p.7 l.18. The threshold angle is a predefined parameter that is chosen a-priori based on the numerical constraint; in most neXtSIM applications, it is  $10^\circ$ . Therefore, remeshing occurs whenever an internal angle in the mesh is smaller than that.

While the angle is used to determine whether the remeshing has to be applied, the remeshing procedure itself uses the edge length of the triangular elements, i.e. resolution. If remeshing is required, it is applied in a local vicinity of a triangular element, called *cavity*, as discussed in Sec. 3.1. A retriangulation process takes place with a consideration also of avoiding abrupt changes in resolution of the mesh. The initial resolution of the mesh is maintained by the length of the edges of the triangles. For example, if the initial mesh resolution is chosen to be 10 km, retriangulation during remeshing process adjusts the edges of an element such that they do not deviate too much from 10 km. This is the same criterion in our 1D case to keep the resolution manageable.

We thank the Reviewer for pointing to a lack of clearness in the manuscript. We have added an explanation at the end of the sentence on p. 7 l. 20 as “The remeshing procedure involves adding new nodes and removing old ones if needed, as

**Response to the referees: “Data assimilation using adaptive, non-conservative, moving mesh models”**

well as triangulation in the cavity to generate a suitable new mesh while maintaining the initially set resolution of the triangular mesh to the same.”.

*4. In section 5.2 and 5.5, the authors introduced the mapping strategy to interpolate each ensemble member onto a fixed reference mesh. Eq. (12), (14) implies that the interpolation is done by taking average of adjacent points with no weights. It looks different from the traditional interpolation method. Why not use the weights relate to the distance?*

The accuracy of our solutions can definitely be improved by using linear or higher order interpolation schemes. Nevertheless, our primary interest here is to investigate and reveal the relationship between the adaptive moving meshes and the fixed reference mesh (the computational choices of the former design those of the latter). We have thus intentionally decided to use a simple mapping using closest neighbouring so as to reduce the complexity in demonstrating the methodology. As discussed on p.17 1.9-11, and in our responses to comment#4 of the referee#2 and comment#1 of the referee#3, our methodology does not lead significant issues on accuracy. Still, we are motivated to assess the impact of more accurate interpolation schemes in our future studies.

*5. Page 15, Line 14. The authors mentioned that localization is not used in this work. Please explain the reason. It is generally acknowledged that localization takes more obvious effects on data assimilation than inflation.*

While we agree with Reviewer about the crucial role of localization to make the success of the EnKF-like methods is high dimension, we were not facing such circumstances here given the relatively small size of the models considered. Furthermore, one of the numerical models we use, the Burgers’ equation, has a fast dampening solution, leading to low spread that we counteract using inflation, another key trick of EnKF methods in practical applications. Nevertheless, our approach would not be affected at all by the use of localization, either covariance or domain localization, as it will be applied onto the fixed reference mesh as in a standard EnKF.

**Response to the referees: “Data assimilation using adaptive, non-conservative, moving mesh models”**

## Response to Anonymous Referee #2

*1. Page 4 Line 20 and Page 5 Line 25: Please explain clearly the novelty of the mesh remapping methodology in this paper compared to the procedure in Du et al. (2016). It seems that similar remeshing (non-conservative moving mesh) and EnKF data assimilation procedures are applied in the two papers.*

Du et al. (2016) developed the methodology using a specific 3D unstructured adaptive mesh fluid model named *Fluidity*. The mesh used in Fluidity adapts to resolve multiscale dynamics optimally. They use a fixed, inhomogeneous, reference mesh which has higher resolution around the fixed observation locations in an attempt to reduce the representativeness error. It is called “observation mesh” and a conservative interpolation method called *supermeshing* is used to interpolate each adaptive mesh on it to compute the innovations. Their approach is efficient for high-dimensional models.

As we stated at the end of Sec. 1.2, our work is influenced by Du et al. (2016) and Bonan et al. (2017) and can be seen as a continuation of them in the context of EnKF studies using adaptive and/or non-conservative moving mesh models. Our models use moving mesh strategy as in Bonan et al. (2017) and have also a mesh adaptation process (remeshing) as in Du et al. (2016). We approach the problem using a fixed reference mesh similar to Du et al. (2016) study. However, one of our objectives is to reveal and exploit the connections between the fixed reference mesh properties and the criteria imposed to the adaptive moving meshes when constructing the computational model. The HR and LR cases presented in the manuscript use a high-/low-resolution fixed reference meshes, respectively, for the analysis. These meshes are not arbitrary but linked to the resolution of the adaptive moving meshes via the remeshing parameters  $\delta_1$  and  $\delta_2$ , i.e. high-resolution mesh is the highest possible resolution mesh (grid size  $\delta_1$ ) that an adaptive moving mesh can have, while low-resolution mesh is the lowest possible ( $\delta_2$ ). This is valid for any 1D models of the same type, yet we are currently using a similar approach in our ongoing study using neXtSIM in 2D.

Another different aspect of our work is the backward mapping of the analyzed state on to the adaptive moving meshes. We perform it to conserve the mesh structure formed by the dynamical evolution of the forecast models. This is probably not the case in Du et al. (2016) methodology because they seem to forward the ensemble after the analysis initialized on the fixed reference mesh, which is same for all the ensemble members.

**Response to the referees: “Data assimilation using adaptive, non-conservative, moving mesh models”**

Last but not least, we investigate also the impact of Lagrangian observations besides Eulerian ones. Therefore, we avoid using a fixed mesh designed for a predefined observation network. Linking the fixed reference mesh to adaptive moving meshes gives us the flexibility to use any model of the same class and any type of observation we want to assimilate.

We addressed the difference in our choice of the fixed reference mesh on p.10 l.28. Prompted by the Reviewer remark, we have modified the original paragraph as follows:

“The challenge in implementing an EnKF on an adaptive moving mesh model with remeshing is that the dimension of the state vector will be potentially different for each ensemble member. This is addressed by Du et al. (2016) in which the idea of a fixed reference mesh, called observation mesh, is introduced which has higher resolution around the predefined observations. We will adopt this approach here but introduce a new variant in utilizing meshes of different resolutions. In particular, we will work with a high- and a low-resolution mesh. We see these as representing the extremes which should bracket the possible results of using meshes of various resolutions. They are, respectively, associated with the two tolerance parameters  $\delta_1$  and  $\delta_2$ , therefore linked directly to the mesh of the models while giving us the flexibility of assimilating any type of observations without prior information so as is generally the case in realistic applications. In addition, in our approach, the analyzed states are mapped back onto the adaptive moving meshes to preserve the mesh resolving fine scale structures generated by the dynamics of the models.”

2. In Figure 3, please explain S1, S2 and S3 briefly, especially the mesh characteristics in the procedures.

Thank you for pointing this out. In the current version of the manuscript, we have extended the caption as follows: “Illustration of the analysis cycle in the proposed EnKF method for adaptive moving mesh models. In S\_1, adaptive moving meshes are mapped onto the fixed reference mesh. The ensemble is updated on the fixed reference mesh at step S\_2 (i.e. the analysis). Then, in S\_3 the updated ensemble members are mapped back to the corresponding adaptive moving meshes. The full process is illustrated in Fig. 4 for one ensemble member. See text in Sect. 5 for full details on the individual process steps, S\_0, S\_1, S\_2 and S\_3.”

3. Page 6 Line 3: Please add explanation of the Lagrangian and remeshing features of the neXtSIM’s 1D mesh such as in section 1.3 briefly.

**Response to the referees: “Data assimilation using adaptive, non-conservative, moving mesh models”**

neXtSIM is a 2D sea-ice model using a Lagrangian solver. It doesn't have a 1D implementation. We explained the relevant properties of neXtSIM for our present study in Sec. 3.1 p.7 l.12-20. Motivated by the Reviewer' remark, we provide further information on how the remeshing acts on a mesh on p. 7 l. 20 as “The remeshing procedure involves adding new nodes and removing old ones if needed, as well as triangulation in the cavity to generate a suitable new mesh while maintaining the initially set resolution of the triangular mesh to the same.”

*4. It's not so clear that if the parameters  $\delta_1$  and  $\delta_2$  are used both in one mesh or two meshes with different resolutions separately in section 3.1. In section 5.2, it seems the two parameters are for HR and LR separately. If so, why the ratio of the remeshing criteria is discussed in Page 17 Line 10?*

Parameters  $\delta_1$  and  $\delta_2$  are used for two different, albeit interconnected in our approach, reasons. First, they are the remeshing criteria which determine the minimum and maximum threshold of distance between two consecutive adaptive moving mesh nodes. If the criteria are not satisfied remeshing occurs to form a valid mesh. Parameters  $\delta_1$  and  $\delta_2$  are assumed to be given together with the model and are thus in general unrelated to data assimilation. A description of the remeshing is given Sec. 3.2. In our proposed approach for data assimilation, we use them to define the high-/low-resolution fixed reference meshes. These are two, alternative to each other, possible meshes, each of them related to the computational constraints with which the model is built. In particular,  $\delta_1$  defines the high-resolution fixed reference mesh whereas  $\delta_2$ , the low-resolution fixed reference mesh. This is described in Sec. 5.1.

In our formulation their ratio furthermore sets a threshold on the ratio between the number of nodes on the fixed reference and on adaptive moving meshes. In the HR case, the resolution of the fixed reference mesh is  $\delta_1$ . Therefore, given that the length of the computational domain is  $L$ , the number of nodes on the fixed reference mesh is  $L/\delta_1$  (see Sec. 5.1). This is also the maximum resolution that an adaptive moving mesh can ever reach, in which case the adaptive moving mesh would be identical to the fixed reference mesh. At opposite side, the minimum number of nodes on an adaptive moving is, by construction, equal to  $L/\delta_2$ . As a consequence, the ratio  $\delta_2/\delta_1$  limits the nodes exceedance of the HR over any adaptive moving mesh. In the LR case, it is the contrary, i.e. the ratio  $\delta_2/\delta_1$  limits the nodes exceedance of any adaptive moving mesh as respect to the LR fixed reference mesh.

In the experiments presented in the manuscript, we set  $\delta_2/\delta_1=2$ . As an example, consider the HR case, and a situation where the fixed reference mesh has twice the number of nodes those in an adaptive moving mesh. This implies that every



**Response to the referees:** *“Data assimilation using adaptive, non-conservative, moving mesh models”*

other node on the fixed reference mesh will be left empty after the mapping, and therefore, every  $\gamma_i$  will need to be filled by using the adjacent nodes  $\gamma_{i-1}$  and  $\gamma_{i+1}$  on the fixed reference mesh. Note also that the arithmetic average is in this case equal to the weighted average since  $\gamma_{i-1}$  and  $\gamma_{i+1}$  are at equal distance (cf. Eq. 12 and 13).

In the LR case, in the most extreme situation, an adaptive moving mesh can have at most twice the number of nodes of the fixed reference mesh. This implies every two consecutive adaptive moving mesh nodes will be averaged on a fixed reference mesh node.

We believe that our choice to connect the properties of the fixed meshes onto which the analysis is performed to the remeshing criteria of the model forward computation is key to the success of our approach, since it avoids excessive interpolation/smoothing in HR/LR cases respectively.

To further clarify this point, we expanded the paragraph on p.17 l.10 as: “In fact,  $\delta_2/\delta_1$  is the upper bound of the number of nodes that will be interpolated in the HR case, and averaged in the LR case respectively, since it represents the maximum ratio between the dimension of the fixed reference mesh and that a moving mesh can ever reach.”

*5. More details of the EnKF data assimilation process in the numerical experiments should be declared, such as the DA time interval. Is it the same when using two different types of observations?*

The DA time (analysis) interval is given as  $\Delta t = 0.05$  in Tab.1 and on p.20 l.1. It is the same for all DA experiments as stated on p.20 l.2. We expand that line as “The analysis interval is set to  $\Delta t = 0.05$  time units in all the DA experiments and for both models and observation types.” All the relevant DA parameters are listed on Tab.1-3 as well as mentioned in the text in sections 6, 7.1 and 7.2.

**Response to the referees: “Data assimilation using adaptive, non-conservative, moving mesh models”**

Response to Anonymous Referee #3

GENERAL COMMENTS

1) *Your approach heavily relies on the quality of your forward and backward mappings. If they introduce too much interpolation errors, it may lead to severe inaccuracies. It seems not to be the case in your experiment. Nevertheless, I still have some questions on the forward and backward mapping:*

We think the reason why severe inaccuracies do not appear in our experiments is that we control the number of nodes to be used for the mapping via the remeshing parameters  $\delta_1$  and  $\delta_2$  as explained on p.17 1.9-11 as well as in the following responses.

*– Why do you use such crude interpolation for HR and LR cases for the forward mapping? Why not using for example a classical linear interpolation instead?*

The accuracy of the interpolation can, and will in our current ongoing 2D research, be improved. However, the results demonstrate already the success of the methodology with such a simple mapping. Our primary interest here is to investigate and reveal the relationship between the adaptive moving meshes and the fixed reference mesh (the computational choices of the former design those of the latter). We have thus intentionally decided to use a simple mapping using closest neighbouring nodes so as to reduce the complexity in demonstrating the methodology.

*– The forward mapping adds errors to forecast estimates. Then you perform a linear interpolation in the observation operator to obtain observation equivalents meaning that you add an additional interpolation error from estimates that already contain interpolation error. Could you assess the effect of each interpolation (forward mapping and observation operator) on results (if possible)? Also would it not be possible to have a reference grid that contains points located to observation locations in order to avoid the double interpolation?*

We thank the Reviewer for these key remarks. As for the former, note that Fig. 7 and 10, were exactly designed for this scope, i.e. to quantify the impact of the error coming from forward and backward mapping steps. This is done by computing/comparing with the RMSE of an idealised DA-free run in which those mappings are included (even though

**Response to the referees: “Data assimilation using adaptive, non-conservative, moving mesh models”**

DA is actually not taking place). As anticipated by the Reviewer’s second remark above, in order to quantify the error due to the observation operator, we would have to define the reference fixed mesh so as to have nodes on observations locations; this is the choice done by Du et al (2016).

While such a choice is clearly appealing as it helps reducing the representativeness error due to the observation operator, our focus here is different. We are interested in connecting the fixed reference mesh properties to those of and the adaptive moving meshes defined by the model design, without making use of the knowledge about the observation locations. This choice allows us to straightforwardly apply our approach to any new observations may be deployed. This is particularly useful in the perspective of using our approach with neXtSIM and the several new observation programs for the Arctic. Furthermore, in Sec. 7.3, we assess the impact of Lagrangian observations (a type of observing facility of great importance in the Arctic), for which would have been extremely difficult, let alone if meaningful, to define the grid a priori based on observations locations.

*– Is the backward mapping necessary in your approach? You may transfer new analysed states on old grids that are not necessary fit for the new physics of the analysis (at least you are adding another error due to interpolation). Why not restarting the model using the analysed states directly on the reference grid after process S 2 (in Fig. 3) and let the model do the potentially needed remeshing from the reference grid for each ensemble member?*

Again, we thank the Reviewer for her/his remark. This allows us to clarify further the reasons behind our choices. We agree that we could have restarted the forecasts from the fixed reference mesh, however, it requires time for the adaptive moving meshes to adapt to the underlying dynamics. The backward mapping is introduced in our methodology to preserve the mesh structure resolving fine scales generated by the models. Therefore, we preferred to map them back to the adaptive moving meshes they correspond to.

Moreover, we think that the backward mapping is probably the less problematic step of the methodology. In the HR case, the forward mapping from the fixed reference mesh to the adaptive moving meshes is injective, i.e. every node on an adaptive moving mesh is mapped onto a unique fixed reference mesh node, but not surjective i.e. not covering them all. The backward mapping is instead bijective from a subset of the fixed reference mesh to any adaptive moving meshes i.e. one-to-one and onto. Therefore, in the HR case, we actually introduce error not because of the mapping but as a

**Response to the referees: “Data assimilation using adaptive, non-conservative, moving mesh models”**

consequence of the interpolation on the fixed reference mesh (Eq. 12 and 13) which reveals itself only in covariances and diagnostics on the fixed reference mesh.

In LR case, on the other hand, as illustrated in Fig. 4, we introduce error in backward mapping since it is not one-to-one. We discuss the relative error between the HR and LR cases shown in Fig. 7 and 10. Accuracy in the LR case is comparable, if not better, to the one in HR case. As a result, we preferred a similar mapping in the LR case instead of linear or higher order interpolation.

*2) Your introduction emphasises on neXtSIM but they are many differences between neXtSIM and the study cases. Among others, both study cases work on a fixed domain while neXtSIM works on a moving domain (where there is sea ice). While I consider this work being useful for the sea ice application, I think that a discussion on how this work could be adapted to neXtSIM is missing. I suggest you include one in your revised manuscript or either you downplay the importance of the sea ice application in your paper.*

The properties of the medium studied in this work and in neXtSIM are different as we discussed in the last paragraph of the conclusions. Here, we work with continuous fluid-like models whereas sea-ice in neXtSIM is a discontinuous solid-like material. However, computational domain of neXtSIM is not restricted only to the regions where there is sea-ice. Rather, there are computational nodes also in the ice-free areas where ice may appear due to the thermo-dynamical conditions/freezing. Therefore, the question is how the update will be performed considering the physical properties of the discontinuous and non-gaussian material in neXtSIM.

We therefore prefer to keep the description of neXtSIM in the manuscript. We have also discussed this choice in our response to the comment #1 of the referee #1. However, prompted by the Reviewer remark, we broaden the discussion on the last paragraph of the conclusions as follows:

“Such a 2D extension is, however, a non-trivial task for a number of fundamental reasons. First of all, given the triangular unstructured mesh in neXtSIM, we cannot straightforwardly define an ordering of the nodes on the adaptive moving mesh, as is done in the 1D case considered here. As a consequence, the determination of a fixed reference mesh might not be linked to the remeshing criteria in the same straightforward way. However, it is still possible to define a high-/low-resolution fixed reference mesh with respect to the mesh of neXtSIM, since the remeshing in neXtSIM is mainly used to

**Response to the referees: “Data assimilation using adaptive, non-conservative, moving mesh models”**

keep the initial resolution throughout the integration. Secondly, the models considered in this study are proxies of continuous fluid flows whereas the rheology implemented in neXtSIM treats the sea ice as a solid brittle material which results in discontinuities when leads and ponds form due to fracturing and ice melting; the Gaussian assumptions implicit in the EnKF formulation may need then to be reconsidered. An interesting aspect of the 2D extension to the sea-ice is that it will promote the use of anisotropic localization approaches to fit with the long-distance anisotropic correlation present in the medium. Nevertheless, the methodology presented in this study, and the experiments herein, confronts some of the key technical issues of the 2D case. The current results in 1D are encouraging regarding the applicability of the proposed modification of the EnKF to adaptive moving mesh models in 2D, and the extension to 2D is the subject of the authors’ current research.”

We also added a paragraph to the end of Sec. 1.3 to clarify our methodological choices in relation to neXtSIM as: “The specific DA methodology we develop for adaptive mesh problems is driven by the considerations of neXtSIM. The remeshing in neXtSIM, and the consequent change in the state vector’s dimension, is addressed in our assimilation scheme by the introduction of a reference mesh. The latter represents a common mesh for forming the error covariance matrix from the ensemble members. The question then arises as to whether this common mesh is used to propagate each individual ensemble member forward in time. From the viewpoint of neXtSIM, however, continuing with the reference mesh, common to all members, could throw away valuable physical information. In fact, the use of a Lagrangian solver in neXtSIM assures that the mesh configurations are naturally attuned to the physical evolution of the ice. For this reason, we make the critical methodological decision to map back to the meshes of the individual ensemble members after the assimilation step. The Lagrangian solver in the model is thus the primary determinant of the mesh configuration used in each forecast step. The reference mesh is only used in a temporary capacity to afford a consistent update at the assimilation step.”

3) *I think you should emphasize more the novelty of your work compared to Du et al. (2016). Many readers do not know that paper and it is worth pointing out that what you do is different from their work.*

Du et al. (2016) developed the methodology using a specific 3D unstructured adaptive mesh fluid model named *Fluidity*. The mesh used in Fluidity adapts to resolve multiscale dynamics optimally. They use a fixed, inhomogeneous, reference mesh which has higher resolution around the fixed observation locations in an attempt to reduce the representativeness

**Response to the referees: “Data assimilation using adaptive, non-conservative, moving mesh models”**

error. It is called “observation mesh” and a conservative interpolation method called *supermeshing* is used to interpolate each adaptive mesh on it to compute the innovations. Their approach is efficient for high-dimensional models.

As we stated at the end of Sec. 1.2, our work is influenced by Du et al. (2016) and Bonan et al. (2017) and can be seen as a continuation of them in the context of EnKF studies using adaptive and/or non-conservative moving mesh models. Our models use moving mesh strategy as in Bonan et al. (2017) and have also a mesh adaptation process (remeshing) as in Du et al. (2016). We approach the problem using a fixed reference mesh similar to Du et al. (2016) study. However, one of our objectives is to reveal and exploit the connections between the fixed reference mesh properties and the criteria imposed to the adaptive moving meshes when constructing the computational model. The HR and LR cases presented in the manuscript use a high-/low-resolution fixed reference meshes, respectively, for the analysis. These meshes are not arbitrary but linked to the resolution of the adaptive moving meshes via the remeshing parameters  $\delta_1$  and  $\delta_2$ , i.e. high-resolution mesh is the highest possible resolution mesh (grid size  $\delta_1$ ) that an adaptive moving mesh can have, while low-resolution mesh is the lowest possible ( $\delta_2$ ). This is valid for any 1D models of the same type, yet we are currently using a similar approach in our ongoing study using neXtSIM in 2D.

Another different aspect of our work is the backward mapping of the analyzed state on to the adaptive moving meshes. We perform it to conserve the mesh structure formed by the dynamical evolution of the forecast models. This is probably not the case in Du et al. (2016) methodology because they seem to forward the ensemble after the analysis initialized on the fixed reference mesh, which is same for all the ensemble members.

Last but not least, we investigate also the impact of Lagrangian observations besides Eulerian ones. Therefore, we avoid using a fixed mesh designed for a predefined observation network. Linking the fixed reference mesh to adaptive moving meshes gives us the flexibility to use any model of the same class and any type of observation we want to assimilate.

We addressed the difference in our choice of the fixed reference mesh on p.10 l.28. Prompted by the Reviewer remark, we have modified the original paragraph as follows:

“The challenge in implementing an EnKF on an adaptive moving mesh model with remeshing is that the dimension of the state vector will be potentially different for each ensemble member. This is addressed by Du et al. (2016) in which the idea of a fixed reference mesh, called observation mesh, is introduced which has higher resolution around the

**Response to the referees: “Data assimilation using adaptive, non-conservative, moving mesh models”**

predefined observations. We will adopt this approach here but introduce a new variant in utilizing meshes of different resolutions. In particular, we will work with a high- and a low-resolution mesh. We see these as representing the extremes which should bracket the possible results of using meshes of various resolutions. They are, respectively, associated with the two tolerance parameters  $\delta_1$  and  $\delta_2$ , therefore linked directly to the mesh of the models while giving us the flexibility of assimilating any type of observations without prior information so as is generally the case in realistic applications. In addition, in our approach, the analyzed states are mapped back onto the adaptive moving meshes to preserve the mesh resolving fine scale structures generated by the dynamics of the models.”

MINOR COMMENTS AND TYPOS

1) p. 4, l. 25: “Our paper goes beyond extant work . . .”, I think you mean *EXISTENT* rather than *extant* here.

We have replaced ‘extant’ with ‘existent’. We thank the Reviewer.

2) p. 5, l. 26: “. . . as the number of mesh points will changeS in time”

We could not find this typo in the submitted manuscript.

3) p. 6, Eq. (5): Can you replace  $u$  by  $v$  in the equation? You already use  $u$  for scalar quantities in Eq. (1) and (2).

The  $u$  variable in Eq. (5) is the same with the ones in Eq. (1) and (2) since the model and mesh equations are coupled. Therefore, we keep it as it is.

4) p. 7, l. 2: Could you reformulate the sentence involving  $t + 2\Delta t$ ? I thought your approach was the following:

– you calculate the new position of mesh points at time  $t + \Delta t$  using the mesh and the physical solution at time  $t$

– then, you calculate the physical solution knowing the new mesh using some conservation principle at time  $t + \Delta t$

– you iterate the approach for each time step

Could you confirm or disprove my claim?

**Response to the referees:** *“Data assimilation using adaptive, non-conservative, moving mesh models”*

Thanks, that is correct, please see the explanation in p. 6 l. 22-25. We replace  $t+2\Delta t$  with  $t + \Delta t$  in the revised version.

5) p. 22, l. 13: *“Interestingly, the EnKF does exhibit great sensitivity . . .”*. I think you rather mean *the EnKF does not exhibit a great sensitivity to  $N_0$* .

Thanks. We correct the phrase as *“Interestingly, the EnKF does not exhibit great sensitivity . . .”*.



# Data assimilation using adaptive, non-conservative, moving mesh models

Ali Aydoğdu<sup>1</sup>, Alberto Carrassi<sup>1,2</sup>, Colin T. Guider<sup>3</sup>, Chris K.R.T Jones<sup>3</sup>, and Pierre Rampal<sup>1</sup>

<sup>1</sup>Nansen Environmental and Remote Sensing Center, Bergen, Norway

<sup>2</sup>Geophysical Institute, University of Bergen, Norway

<sup>3</sup>University of North Carolina, Chapel Hill, USA

**Correspondence:** ali.aydogdu@nersc.no

## Abstract.

Numerical models solved on adaptive moving meshes have become increasingly prevalent in recent years. Motivating problems include the study of fluids in a Lagrangian frame and the presence of highly localized structures such as shock waves or interfaces. In the former case, Lagrangian solvers move the nodes of the mesh with the dynamical flow; in the latter, mesh resolution is increased in the proximity of the localized structure. Mesh adaptation can include remeshing, a procedure that adds or removes mesh nodes according to specific rules reflecting constraints in the numerical solver. In this case, the number of mesh nodes will change during the integration and, as a result, the dimension of the model's state vector will not be conserved. This work presents a novel approach to the formulation of ensemble data assimilation for models with this underlying computational structure. The challenge lies in the fact that remeshing entails a different state space dimension across members of the ensemble, thus impeding the usual computation of consistent ensemble-based statistics. Our methodology adds one forward and one backward mapping step before and after the EnKF analysis respectively. This mapping takes all the ensemble members onto a fixed, uniform, reference mesh where the EnKF analysis can be performed. We consider a high- (HR) and a low-resolution (LR) fixed uniform reference mesh, whose resolutions are determined by the remeshing tolerances. This way the reference meshes embed the model numerical constraints and also are upper and lower uniform meshes bounding the resolutions of the individual ensemble meshes. Numerical experiments are carried out using 1D prototypical models: Burgers and Kuramoto-Sivashinsky equations, and both Eulerian and Lagrangian synthetic observations. While the HR strategy generally outperforms that of LR, their skill difference can be reduced substantially by an optimal tuning of the data assimilation parameters. The LR case is appealing in high-dimensions because of its lower computational burden. Lagrangian observations are shown to be very effective in that fewer of them are able to keep the analysis error at a level comparable to the more numerous observers for the Eulerian case. This study is motivated by the development of suitable EnKF strategies for 2D models of the sea-ice that are numerically solved on a Lagrangian mesh with remeshing.

# 1 Introduction

## 1.1 Adaptive mesh models

The computational model of a physical phenomenon is typically based on solving a particular partial differential equation (PDE) with a numerical scheme. Numerical techniques to solve PDEs evolving in time are most often based on a discretization of the underlying spatial domain. The resulting mesh is generally fixed in time, but the needs of a given application may require for the mesh itself to change as the system evolves, adapting to the underlying physics ([Weller et al., 2010](#)). We consider here the impact of such a numerical approach on data assimilation.

Two reasons that may lead to the use of an adaptive mesh are: (1) for fluid problems, it is sometimes preferable to pose the underlying PDEs in a Lagrangian, as opposed to Eulerian, frame, or (2) the model produces a specific structure, such as a front, shock wave or overflow, that is localized in space. In case (1), the Lagrangian solver will naturally move the mesh with the evolution of the PDE (Baines et al., 2011). For case (2), the idea is to improve computational accuracy by increasing the mesh resolution in a neighborhood of the localized structure (see, e.g. Berger and Olinger, 1984). This may be compensated by the decrease of resolution elsewhere in the domain. Adapting the mesh can prove computationally efficient in that an adaptive mesh generally requires fewer points than a fixed mesh to attain the same level of accuracy (Huang and Russell, 2010). Some important application areas where adaptive meshes have been used are: groundwater equations (Huang et al., 2002), and thin film equations (Alharbi and Naire, 2017) as well as large geophysical systems (Pain et al., 2005; Davies et al., 2011).

## 1.2 Data assimilation for adaptive mesh models: the issue

Data assimilation (DA) is the process by which data from observations are assimilated into a computational model of a physical system. There are numerous mathematical approaches, and associated numerical techniques, for approaching this issue, (see, e.g. Budhiraja et al., 2018). We use the term DA to refer to the collection of methods designed to obtain an estimate of the state and parameters of the system of interest using noisy, usually unevenly distributed, data and an, inevitably approximate, model of its evolution (see, e.g. Asch et al., 2016). There has been considerable development of DA methods in the field of the geosciences, particularly as a tool to estimate accurate initial conditions for numerical weather prediction models; a review on the state-of-the-art of DA for the geosciences can be found in Carrassi et al. (2018).

Mesh adaptation brings significant challenges to DA. In particular, a time-varying mesh may introduce difficulties in the gradient calculation within variational DA (Fang et al., 2006). In an ensemble DA methodology (Evensen, 2009; Houtekamer and Zhang, 2016), the challenge arises from the need to compare different ensemble members in the analysis step. With a moving mesh that depends on the initialization, different ensemble members may be made up of physical quantities evaluated at a different set of spatial points. There is another variation that is key to our considerations here, and that is relevant in both cases described above. The issue is that the nodes in the mesh may become too close together, or too far apart. Both situations can lead to problems with the computational solver. Some adjustment of the mesh, based on some prescribed tolerance, may then be preferable, and even necessary. We will be particularly interested in the implications for DA when this adjustment involves the insertion or deletion of nodes in the mesh. The size of the mesh may then change in time which has the consequence that the

state vectors at different times may not have the same dimension. In other words, the state space itself is changing in dimension with time. Consequently, individual ensemble members, each of them representing a possible realization of the state vector, can even have different dimensions. In this situation, it is not possible to straightforwardly compute the ensemble-based error mean and error covariances that are necessary, and are at the core of the ensemble DA methods (Evensen, 2009). Dealing with  
5 and overcoming this situation is the main aim of this study.

Two specific pieces of work can be viewed as precursors of our methodology. Bonan et al. (2017) study an ice sheet that is moving and modeled by a Lagrangian evolution, but without remeshing. The paper by Du et al. (2016) develops DA on an unstructured adaptive mesh. Their mesh is adapted to the underlying solution to better capture localized structures with a procedure that is akin to the remeshing in neXtSIM. The challenge we address here is the development of a method that will  
10 address models that are based on Lagrangian solvers and involve remeshing.

### 1.3 Motivation: the Lagrangian sea-ice model *neXtSIM*

This work is further motivated by a specific application, namely performing ensemble-based DA for a new class of computational models of sea-ice (Bouillon et al., 2018). In particular, the set-up we develop is based on the specifications of neXtSIM, which is a stand-alone finite element model employing a Maxwell elasto-brittle rheology (Dansereau et al., 2016; Rampal et al.,  
15 2019) to simulate the mechanical behavior of the sea ice. In this new rheological framework, the heterogeneous and intermittent character of sea ice deformation (Marsan et al., 2004; Rampal et al., 2008) is simulated via a combination of the concepts of elastic memory, progressive damage mechanics and viscous-like relaxation of stresses. This model has been applied to simulate the long-term evolution of the Arctic sea ice cover, with significant success when compared to satellite observations of sea ice concentration, thickness and drift (Rampal et al., 2016). It has also been recently shown how crucial this choice for the  
20 ice rheology is in order to improve the model capabilities to reproduce e.g. sea ice drift trajectories. This makes neXtSIM a powerful research numerical tool to study polar climate processes but also for operational applications as e.g. to assist search and rescue operations in ice-infested waters in the polar regions (Rabatel et al., 2018).

neXtSIM is solved on a 2-dimensional unstructured triangular adaptive moving mesh based on a Lagrangian solver that propagates the mesh of the model in time along with the motion of the sea ice (Bouillon and Rampal, 2015). Moreover, a mesh adaptation technique, referred to as *remeshing*, is implemented. It consists of a local mesh adaptation, a specific feature offered by the BAMG library that is included in neXtSIM (<http://www.ann.jussieu.fr/hecht/ftp/bamg/bamg.pdf>). The advantages of a local mesh modification is that it is efficient, introduces very low numerical dissipation (Compère et al., 2009), and also allows local conservation (Compère et al., 2008). The remeshing algorithm operates on the edges of the triangular elements to avoid tangling or distortion of the mesh as well as inserting, or removing, nodes on the mesh in case it is needed to prevent very sharp  
30 refinements resulting in an excessive computational burden.

The specific DA methodology we develop for adaptive mesh problems is driven by the considerations of neXtSIM. The remeshing in neXtSIM, and the consequent change in the state vector's dimension, is addressed in our assimilation scheme by the introduction of a reference mesh. The latter represents a common mesh for forming the error covariance matrix from the ensemble members. The question then arises as to whether this common mesh is used to propagate each individual ensemble

member forward in time. From the viewpoint of neXtSIM, however, continuing with the reference mesh, common to all members, could throw away valuable physical information. In fact, the use of a Lagrangian solver in neXtSIM assures that the mesh configurations are naturally attuned to the physical evolution of the ice. For this reason, we make the critical methodological decision to map back to the meshes of the individual ensemble members after the assimilation step. The Lagrangian solver in the model is thus the primary determinant of the mesh configuration used in each forecast step. The reference mesh is only used in a temporary capacity to afford a consistent update at the assimilation step.

#### 1.4 Goal and outline

In this paper, we construct a 1-dimensional setup designed to capture the core issues that neXtSIM presents for the application of an ensemble-based DA scheme. We perform experiments using both Eulerian (where the observation locations are fixed) and Lagrangian (where observation locations move with the flow) observations. We test the strategy for two well-known PDEs: the viscous Burgers and Kuramoto-Sivashinsky equation, whose associated computational models we refer to as BGM and KSM, respectively. The Burgers' equation, which can be viewed as modeling a one-dimensional fluid, is a canonical example for which a localized structure, in this case a shock wave, develops and an adaptive moving mesh will get denser near the shock front. The Kuramoto-Sivashinsky equation exhibits chaotic behavior and this provides a natural test-bed for DA in a dynamical situation that is very common in physical science, and particularly in the DA applications to the geosciences (see Carrassi et al., 2018, their Sect. 5.2).

Our core strategy is to introduce a fixed reference mesh onto which the meshes of the individual ensemble members are mapped. A key decision is how refined the fixed reference mesh be made. There are two natural choices here: (a) one that has *at most* one node of an adaptive moving mesh in each of its cells, or (b) a reference mesh in which any adaptive moving mesh that may appear has *at least* one node in each cell of the fixed reference mesh. We refer to the former as a *high-resolution fixed reference mesh* (HR) and the latter a *low-resolution fixed reference mesh* (LR). A natural guess would be that the high-resolution mesh will behave more accurately. Although this turns out generally to be true, we will show that low-resolution mesh may result in a better estimate when the ensemble is appropriately tuned.

There have been other recent studies aimed at tackling the issue of DA on adaptive and/or moving meshes. Partridge (2013) studied a methodology to deal with a moving mesh model of an ice-sheet in a variational DA framework. Bonan et al. (2017) extended the study and provided a comparison between a three dimensional variational assimilation (3D-Var; Talagrand (1997)) and an ensemble transform Kalman filter (ETKF; Bishop et al. (2001)). The mesh they use adapts itself to the flow of the ice-sheet but, in contrast to our case, the total number of nodes on the mesh is conserved.

Du et al. (2016) approach the issue in an ensemble DA framework using a three dimensional unstructured adaptive mesh model of geophysical flows (Maddison et al., 2011; Davies et al., 2011). They adopt a fixed reference mesh on which the analysis is carried out. Each ensemble member is interpolated onto a fixed reference mesh conservatively using a method called supermeshing developed by Farrell et al. (2009). In Jain et al. (2018) a similar methodology is used for a tsunami application which exploits adaptive mesh refinement on a regular mesh. Instead of using a fixed reference mesh, they use the union of meshes of all the ensemble members to perform the analysis. ~~Our paper goes beyond extant work-~~

In summary, Bonan et al. (2017) addresses the issues that arise with a Lagrangian solver without any remeshing, whereas the approach in Du et al. (2016) is developed for a model that has remeshing as part of its numerical algorithm, but uses another wise static mesh. The numerical solver underlying neXtSIM has both features and thus requires a methodology that differs from these two approaches. Our paper therefore goes beyond existent works in developing a scheme that addresses the case of

5 a moving mesh with non-conservative mesh adaptation.

The paper is organized as follows: in Sect. 2, we detail the problem of interest. In Sect. 3, we describe the nature of the adaptive moving mesh methodologies in one dimension and describe a remeshing process that is implemented intermittently. Section 4 details the model state and its evolution on the adaptive, non-conservative, 1D mesh. In Sect. 5, we introduce the EnKF using an adaptive moving mesh model. Here, we describe the fixed reference mesh on which the ensemble members are  
 10 projected in order to perform the analysis and discuss the forward and backward mapping between the adaptive moving and fixed reference meshes, along with the implications for, and the modifications to, the EnKF. Section 6 provides the experimental setup of the numerical experiments whose results are presented and discussed in Sect. 7. Conclusions and a forward looking discussion make up Sect. 8.

## 2 The physical model and its integration

15 This paper focuses on a physical model describing the evolution of a scalar quantity,  $u$  (e.g. the temperature, pressure, or one of the velocity components of a fluid), on a one-dimensional (1D) periodic domain  $[0, L)$ . We assume that a model of the temporal evolution of  $u$  is available in the form of a partial differential equation (PDE)

$$\frac{\partial u}{\partial t} = f\left(u, \frac{\partial u}{\partial z}, \dots, \frac{\partial^i u}{\partial z^i}, \dots\right) \text{ where } i \in \mathbb{N}, 0 \leq z < L, 0 < t_0 < t \quad (1)$$

with initial and boundary conditions

$$20 \quad u(t_0, z) = u_0(z), \quad u(t, 0) = u(t, L), \quad (2)$$

and with  $f$  being, in general, a nonlinear function. Realistic models of geophysical fluids incorporate (many) more variables, and are expressed as a coupled system of PDEs. A notable example in the field of geosciences, and fluid-dynamics in general, is the system of Navier-Stokes equations; the fundamental physical equations in neXtSIM have the same form (Rampal et al., 2016). In this study, we consider the simpler 1D framework as a proxy of the 2D one in neXtSIM but, as will be made clear  
 25 below, we formulate the 1D problem to capture many of the key numerical features of neXtSIM. Some of the challenges and issues for the higher dimensional case are discussed in Sect. 8.

Solving Eq. (1) numerically, with initial and boundary conditions Eqs. (2), would usually involve the following steps: first, discretizing the original PDE in the spatial domain (e.g. using a central finite difference scheme), and then integrating, forward in time, the resulting system of ordinary differential equations (ODEs) using an ODE solver (e.g. an Euler or Runge Kutta  
 30 method). This standard approach to numerically solving a PDE is appropriate when it is cast in an Eulerian frame. A key point about neXtSIM, however, is that it is solved in a Lagrangian frame. The use of a Lagrangian solver is a particular case of a

class of techniques what is known as velocity-based methods in the adaptive mesh literature (see e.g. Baines et al., 2011, and references therein). The dynamics of the adaptive mesh are given, in this case, by using  $u$  coming from the PDE (1) as the velocity field for the mesh points. The book by Huang and Russell (2010) gives a comprehensive and detailed treatment of the case of adaptive meshes.

5 A further key feature of neXtSIM as a computational model is that it incorporates a remeshing procedure. As a result, it is different from the usual problems considered in the adaptive mesh literature (Huang and Russell, 2010). In particular it entails that, in general, no continuous mapping exists from a fixed mesh to the adaptive mesh that is continuous in time. We call such an adaptive mesh *non-conservative* as the number of mesh points will change in time. It is this characteristic that we see as presenting the greatest challenge to a formulation of DA for neXtSIM, and addressing it in a model situation as the main  
 10 contribution of this paper and one that makes it stand apart from previous work in the area of DA for computational models with non-standard meshes.

### 3 A one-dimensional, non-conservative, velocity-based adaptive moving mesh

#### 3.1 The mesh features and its setup

We build here a 1D periodic adaptive moving mesh that retains the key features of the neXtSIM's 2D mesh in being Lagrangian  
 15 and including remeshing.

For a fixed time, a mesh is given by a set of points  $\{z_1, z_2, \dots, z_N\}$  with each  $z_j \in [0, L)$ . The  $z_j$  are referred to as the mesh nodes, or points, and we assume they are ordered as follows:

$$0 \leq z_1 < \dots < z_j < \dots < z_N < L. \quad (3)$$

To guide the remeshing, we define the notion of a *valid mesh* in which the mesh nodes are neither too close nor too far apart.  
 20 To this end, we define two parameters:  $0 < \delta_1 < \delta_2 < L$ . A mesh  $\{z_1, z_2, \dots, z_N\}$  is a valid mesh if:

$$\delta_1 \leq |z_{j+1} - z_j| \leq \delta_2 \text{ for all } j \in \mathbb{N}: 1 \leq j < N-1, \quad \text{and} \quad \delta_1 \leq |z_1 + L - z_N| \leq \delta_2. \quad (4)$$

It is further assumed that  $\delta_2/\delta_1 \geq 2$  and that both  $\delta_2$  and  $\delta_1$  are divisors of  $L$ . The former hypothesis is related to the remeshing procedure and will be discussed in Sect. 3.2, while the latter is useful in our DA approach and will be discussed in Sect. 5.1. When condition (4) does not hold the mesh is called an *invalid mesh*.

25 The mesh will evolve following the Lagrangian dynamics associated with the solution of the PDE, Eq. (1). Each  $z_j$  will therefore satisfy the equation:

$$\dot{z}_j = u(t, z_j), \quad (5)$$

where  $\dot{\cdot} = \frac{d}{dt}$ , and  $u(t, z_j)$  is the velocity. The physical model, Eq. (1), together with the mesh model, Eq. (5), constitute a set of coupled equations that can be solved either simultaneously, or alternately (Huang and Russell, 2010). In the former case,  
 30 the mesh and physical models are solved at the same time, which strongly ties them together. A drawback of simultaneous

numerical integration is that the large coupled system of equations arising by joining the mesh and the physical models is often more difficult to solve and may not conserve some features of the original physical model.

The neXtSIM model adopts an alternative strategy that bases the prediction of the mesh at time  $t + \Delta t$ , where  $\Delta t$  is the computational time step, on the mesh and the velocity field at the current time,  $t$ , and then subsequently obtain the physical solution on the new mesh at time  $t + \Delta t$ . As a consequence, the mesh is adjusted to the solution at one time-step earlier. This can cause imbalance, especially for low-resolution time discretization and rapidly changing systems, but it offers the advantage that the mesh generator can be coded as a separate module to be incorporated alongside the main PDE solver for the physical model. This facilitates the possible addition of conditions or constraints on the mesh adaptation and evolution. Having this ability is key to the remeshing procedure in neXtSIM.

In neXtSIM, the coupled system, which includes the mesh and the physical model, is solved in three successive steps: (1) The mesh solver is integrated to obtain the mesh points at  $t + \Delta t$  based on the mesh and the physical solution at time  $t$ ; (2) It is then checked whether the new mesh points satisfy the requisite condition and, if not, the *remeshing* procedure is implemented; (3) The physical solution is then computed at  $t + 2\Delta t$  on the (possibly remeshed) mesh at  $t + \Delta t$ .

In the first step, the movement of the mesh nodes is determined by the behavior of the physical model, which is a special case of the mesh being adaptive. In particular, the dynamics of the physical model can lead to the emergence of sharp fronts or other localized structures. These features can then be better resolved through the finer grid that now covers the relevant region, which is the usual motivation behind the use of adaptive meshes in general. This may result, however, in the allocation of a significant quantity of the total number of nodes to a small portion of the computational domain. Such a convergence of multiple nodes in a small area can lead to a reduction of the computational accuracy in other areas of the model domain and to the increase of the computational cost as smaller time steps will be required. In the case of a mesh made up of triangular elements, as in neXtSIM, those may get too distorted leading again to a reduction of the numerical accuracy of the finite element solution (Babuška and Aziz, 1976).

Adaptive mesh methods often invoke a mesh density function in Eq. (5) to control the mesh evolution (Huang and Russell, 2010). In some cases, such as at a fluid-solid interface, large distortions may not be easily handled by moving mesh techniques alone, nor addressed by a mesh density functions (Saksono et al., 2007). In these cases, a *remeshing* is performed (step (2) above) in order to distribute the nodes in the mesh consistently with the numerical accuracy and the computational constraints. In neXtSIM, an analogous situation occurs due to the rheology that generates and propagates fractures or leads breaking the sea ice. For computational efficiency, a local remeshing is performed in the vicinity of a triangular element, called a cavity, when an element is too distorted. For example, Rampal et al. (2016) considers a triangular element distorted if it has a node with internal angle less than or equal to  $10^\circ$ . The remeshing procedure involves adding new nodes and removing old ones if needed, as well as triangulation in the cavity to generate a suitable new mesh while maintaining the initially set resolution of the triangular mesh to the same.

In the 1D models described in Sect. 6, the former challenge appears due to the nature of the physical system they describe. For instance, in Burgers' equation, the formation of sharp shock-like front causes a convergence of mesh points. A suitable remeshing procedure is then applied.

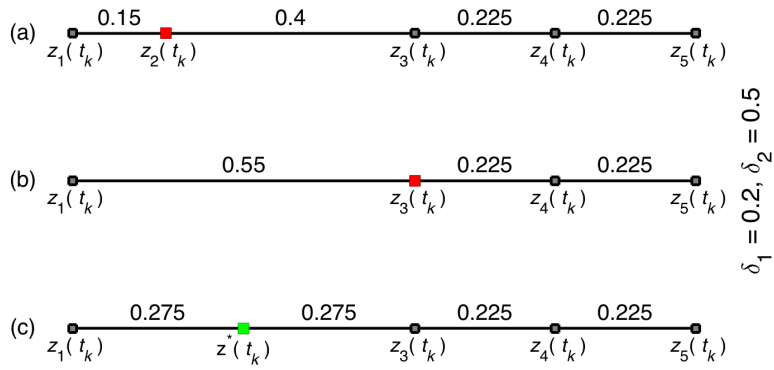

**Figure 1.** An illustration of the remeshing process with  $\delta_1 = 0.2$  and  $\delta_2 = 0.5$ : invalid mesh (a) remove  $z_2(t_k)$  which violates  $\delta_1$  (b) and insert  $z^*(t_k)$  not to violate  $\delta_2$  (c)

We now view the mesh points  $z_j = z_j(t)$  as evolving in time according to Eq. (5), and the computational time step  $\Delta t$  is chosen small enough so that the ordering given in Eq. (3) is preserved; the smallness of  $\Delta t$  has thus afforded the use of a low-order, straightforward Euler scheme to evolve the PDE forward in time. At each computational time step starting at, say,  $t = t_k$ , i.e., at each  $t = t_k + i\Delta t$  remeshing may be performed according to the procedure given below.

### 5 3.2 The remeshing procedure

When an invalid mesh is encountered as a result of the advection process, a new valid mesh is created that preserves as many of these nodes as possible. A validity check is made at each computational time step. The remeshing is accomplished by looping through the nodes  $z_j$  at time  $t_k$  to check if the next node  $z_{j+1}$  satisfies (4) based on the parameters  $\delta_1$  and  $\delta_2$ . Recall that we assume  $\delta_2 \geq 2\delta_1$ .

10 For each  $j$ , if the mesh node  $z_{j+1}$  is too close to  $z_j$  in that the left inequality in condition (4) is violated then  $z_{j+1}$  is deleted. Similarly, if node  $z_{j+1}$  is too far from  $z_j$ , then a new node  $z^*$  is inserted in between  $z_j$  and  $z_{j+1}$  at  $z^* = \frac{z_{j+1} + z_j}{2}$ . Further, if  $z_1 + L - z_N$  is either too large or too small, a similar procedure is implemented. We can understand now what motivates the choice of setting  $\delta_2 \geq 2\delta_1$  (cf Sect. 3.1): if  $\delta_2 \ll 2\delta_1$  the insertion of a new node in the middle of the cell would then create an invalid mesh.

15 The result of the remeshing will be a new mesh re-ordered according to (3) and the mesh will be valid in that (4) is satisfied. Note that any newly introduced node in the last step of the procedure may end up as either the first or last in the ordered set of mesh nodes. Further, a node that survives the remeshing may have a new index because of other new nodes or the deletion of old nodes. The number of nodes in a mesh may change after a remeshing. This has the implication that the dimension of the state vector will not be constant in time. It is this feature that makes this situation so different from standard DA and challenges  
20 us to create a new formulation.

The remeshing algorithm, with  $\delta_1/\delta_2 = 0.2/0.5$ , is illustrated in Fig. 1, for the node  $z_1(t_k)$  at a particular time  $t = t_k$  of the integration. The node  $z_2(t_k)$  has a distance of 0.15 from  $z_1(t_k)$  which is smaller than  $\delta_1$ : therefore,  $z_2(t_k)$  is removed



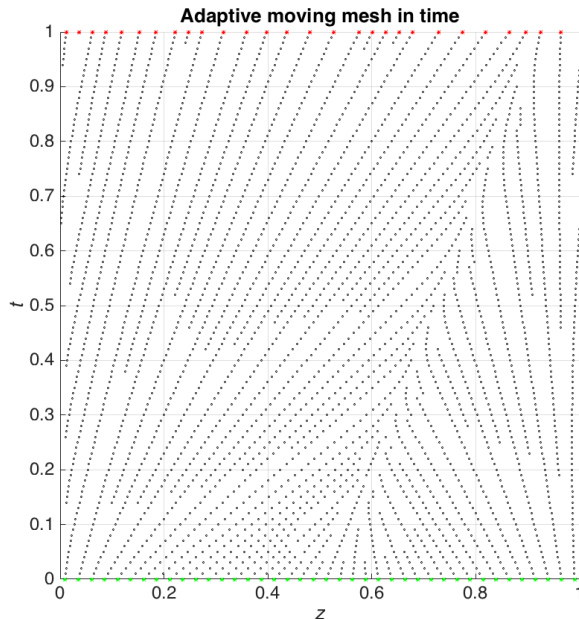

**Figure 2.** An illustration of adaptive moving mesh over time solving Burgers' equation (see Sect. 6) until  $t = 1$  on a domain  $z=[0,1]$ . In this example, the remeshing criteria are based on  $\delta_1 = 0.02$  and  $\delta_2 = 0.05$ . There are 40 initial adaptive moving mesh nodes and 27 at  $t = 1$ ; these are shown in green and red, respectively.

(Fig. 1a). The next node, now  $z_3(t_k)$ , has distance  $0.055$  from  $z_1(t_k)$  which exceeds  $\delta_2$  (Fig. 1b): therefore, a new node,  $z^*(t_k)$  is introduced at the mid-point between  $z_1(t_k)$  and  $z_3(t_k)$  (Fig. 1c).

Figure 2 shows an example of this remeshing procedure applied to a velocity-based adaptive moving mesh using Burgers' equation (cf Sect. 6 for details) as a physical model. We see how the nodes, oriented along the horizontal axis, follow a moving front. In particular, the mesh which initially has 40, equally distributed, nodes ends up having only 27, unevenly distributed nodes, as a result of the remeshing procedure.

#### 4 The model state and its evolution

Since both the physical value(s) representing the system and the mesh on which the PDE is solved are evolved, we represent both in the state vector. The dimension of the state vector is then  $2N$  where  $N$  is the number of mesh nodes:

$$\mathbf{x} = (u_1, u_2, \dots, u_N, z_1, z_2, \dots, z_N) \in \mathbb{R}^N \times [0, L]^N \quad (6)$$

where the  $z_i$  are viewed as the mesh nodes and  $u_i$  the values of the physical variable  $u$  at  $z_i$ .

The model will encompass all the algebraic relations of the computation, including the mesh advancement and remeshing. It not be defined for every  $\mathbf{x} \in \mathbb{R}^N \times [0, L]^N$ . Indeed, the mesh nodes will need to satisfy (3). We therefore introduce  $V_N \subset [0, L]^N$  by the condition that  $\mathbf{z} = (z_1, z_2, \dots, z_N) \in V_N$  when (3) holds.

The model will be operating between observation times. If we set  $t = t_k$  as an observation time and  $t = t_{k+1}$  as the next time at which observations will be assimilated, the model will be integrated with an adapting mesh, including Lagrangian evolution and possible multiple remeshings, from  $t_k$  to  $t_{k+1}$ . If  $\mathbf{x}_k = \mathbf{x}(t_k)$  then we set this model evolution as a map

$$\mathbf{x}_{k+1} = \mathcal{M}(\mathbf{x}_k). \quad (7)$$

Note that if the original PDE (1) is nonautonomous, i.e.,  $f$  depends on  $t$  directly, then  $\mathcal{M}$  will depend on  $k$  and we would write  $\mathcal{M} = \mathcal{M}_k$ . For convenience, we assume that  $t_{k+1} - t_k$  is a multiple of the computational time step. Moreover, we begin and end each integration between observation times with a remeshing if the given mesh is invalid. In this way, we guarantee that both  $\mathbf{z}_k$  and  $\mathbf{z}_{k+1}$  can be taken to correspond to valid meshes. In principle, we can then apply  $\mathcal{M}$  to any element  $\mathbf{x} \in \mathbb{R}^N \times V_N$ . Because of the tolerances  $\delta_1$  and  $\delta_2$  there are, however, constraints on  $N$ . Since they are both divisors of  $L$ , we can introduce  $N_1$  and  $N_2$  by

$$L = N_1 \delta_1 = N_2 \delta_2, \quad (8)$$

and we can restrict to  $N_2 \leq N \leq N_1$ . We can then view  $\mathcal{M}$  as acting on a larger space that puts all of its possible domains together. To this end, we set  $\mathbb{X}_N = \mathbb{R}^N \times V_N$  and, viewing each  $\mathbb{X}_N$  as distinct,

$$\mathbb{X} = \bigcup_{N=N_2}^{N_1} \mathbb{X}_N, \quad (9)$$

and cast  $\mathcal{M}$  as a mapping from  $\mathbb{X}$  to itself, i.e.,  $\mathcal{M} : \mathbb{X} \rightarrow \mathbb{X}$ . Noting again that the  $N$  may change under this map, i.e.,  $N$  may be different for  $\mathbf{x}_k$  and  $\mathbf{x}_{k+1}$ . In other words if  $\mathbf{x}_k \in \mathbb{X}_{N_k}$ , the next iteration  $\mathbf{x}_{k+1} \in \mathbb{X}_{N_{k+1}}$  with, in general  $N_{k+1} \neq N_k$ .

## 5 The ensemble Kalman filter for an adaptive moving mesh model

We introduce a modification of the EnKF (Evensen, 2009) suitable for numerical models integrated on an adaptive moving mesh. The discussion herein pertains to the stochastic version of the EnKF (Burgers et al., 1998), but the approach can be straightforwardly extended to deterministic EnKFs (see, e.g. Sakov and Oke, 2008) without major modifications. A recent review on EnKF-like methods and their application to atmospheric circulation models can be found in (Houtekamer and Zhang, 2016).

The EnKF, originally introduced by Evensen (1994), is an ensemble-based formulation of the classical Kalman Filter (KF) for linear dynamics (KF; Kalman, 1960). Like the KF, the EnKF is based on a Gaussian assumption for the error statistics, in that they are fully described by the mean and covariance. The solution is obtained recursively by alternating a forecast step during which the state estimate and the associated error covariance are propagated in time, and an analysis step in which the forecast state is combined with the observations. The analysis, which is viewed as the best possible estimate of the system's

state, is obtained as the minimum variance estimator (see, e.g. Evensen, 2003). The EnKF computes the error statistics (i.e., mean and covariance) using an ensemble of model realizations (Evensen, 2003). The forward integration of the ensemble under the model dynamics replaces the explicit matrix multiplications involved in the forecast step of the KF. The EnKF, in conjunction with implementing localization and inflation (see, e.g. Carrassi et al., 2018, their Sect. 4.4 and references therein),  
5 has proved accurate in high-dimensional systems by using a number of ensemble members several orders of magnitude smaller than the system's dimension. The EnKF has led to dramatic computational savings over the standard KF, and, importantly, does not require the model dynamics to be linear or linearized.

The challenge in implementing an EnKF on an adaptive moving mesh model with remeshing is that the dimension of the state vector will be potentially different for each ensemble member. This is addressed by Du et al. (2016) in which the idea of  
10 a fixed reference mesh ~~is introduced~~, called observation mesh, is introduced which has higher resolution around the predefined observations. We will adopt this approach here but introduce a new variant in utilizing meshes of different resolutions. In particular, we will work with a ~~high and a low resolution~~ high- and a low-resolution mesh. We see these as representing the extremes which should bracket the possible results of using meshes of various resolutions. They are, respectively, associated with the two tolerance parameters  $\delta_1$  and  $\delta_2$ , ~~therefore linked directly to the mesh of the models while giving us the flexibility~~  
15 of assimilating any type of observations without prior information so as is generally the case in realistic applications. In addition, in our approach, the analyzed states are mapped back onto the adaptive moving meshes to preserve the mesh resolving fine scale structures generated by the dynamics of the models.

The location of the nodes and their total number are bound to change with time and across ensemble members: each member will now provide a distinct discrete representation of the underlying continuous physical process, based on a different number  
20 of differently located sample points. The individual ensemble members have to be intended now as samples from a different partition of the physical system's phase space and they do not provide a statistically consistent sampling of the discrete-in-space uncertainty distribution. This is reflected in practice by the fact that the members can not any longer be stored column-wise to form ensemble matrices and thus the matrix computations involved in the EnKF analysis to evaluate the ensemble-based mean and covariance, cannot be performed.

25 On the other hand, on the reference mesh, the members are all samples from the same discrete distribution and can thus be used to compute the ensemble-based mean and covariance. The entire EnKF analysis process is carried out on this fixed reference mesh, and the results are then mapped back to the individual ensemble meshes. This procedure amounts to the addition of two steps on top of those in the standard EnKF. First, we map each ensemble member from its adaptive moving mesh to an appropriate fixed uniform mesh, and perform the analysis. Then, the updated ensemble members are mapped back  
30 to their adaptive moving meshes, providing the ensemble for the next forecast step.

The process is summarized schematically in Fig. 3. Steps  $S_0$  and  $S_2$ , integration of the model  $\mathcal{M}$  to compute prior statistics, and the analysis step, respectively, are common in an EnKF. At step  $S_1$ , before the analysis, the forecast ensemble on adaptive moving meshes is mapped onto the fixed uniform mesh (Sect. 5.1), while step  $S_3$  amounts for the back mapping from the fixed to the individual adaptive meshes. In the following sections, we give the details of processes in  $S_1$ ,  $S_2$ , and  $S_3$  following their  
35 respective order in the whole DA cycle.

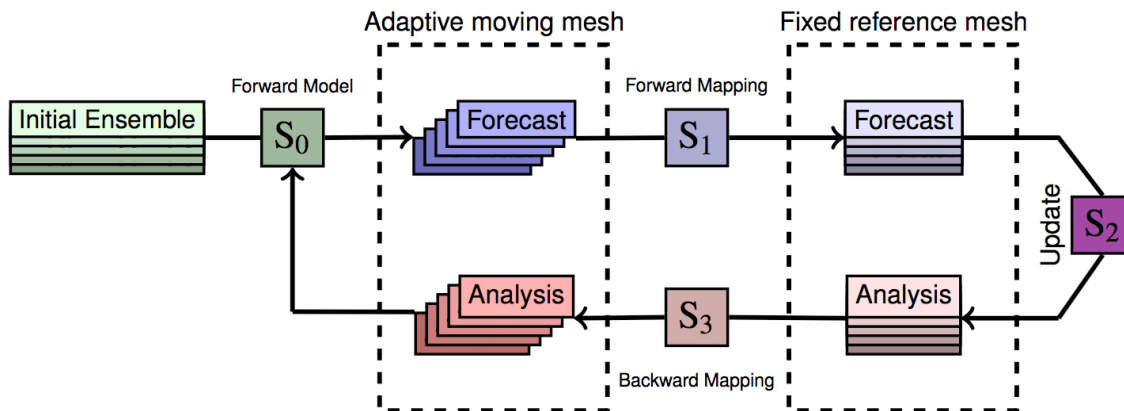

**Figure 3.** Illustration of the analysis cycle followed by in the proposed EnKF using method for adaptive moving mesh models. Each of In  $S_1$ , adaptive moving meshes are mapped onto the processes  $S_0$ ,  $S_1$ ,  $S_2$  and fixed reference mesh. The ensemble is updated on the fixed reference mesh at step  $S_2$  (i.e. the analysis). Then, in  $S_3$  the updated ensemble members are mapped back to the corresponding adaptive moving meshes. The full process is explained illustrated in Fig. 4 for one ensemble member. See text in Sect. 5 for full details on the individual process steps,  $S_0$ ,  $S_1$ ,  $S_2$  and  $S_3$ .

## 5.1 Fixed reference meshes

We divide the physical domain  $[0, L]$  into  $M$  cells of equal length,  $\Delta\gamma$ :

$$[0, L] = L_1 \cup L_2 \cup \dots \cup L_M, \quad (10)$$

where  $L_i = [\gamma_i, \gamma_{i+1})$ . It follows that  $\gamma_1 = 0$  and  $\gamma_i = (i-1)\Delta\gamma$  for each  $i$ , and that  $\gamma_{M+1} = L$ . Because of the periodicity, we identify 0 and  $L$  in the fixed mesh; in other words,  $\gamma_{M+1} = \gamma_1$  modulo  $L$ . The points  $\gamma_i$  are the *mesh nodes* of the fixed reference mesh.

While we are, in principle, free to choose the fixed reference mesh arbitrarily, it makes sense to tailor it to the application under consideration. We choose to define the resolution of this fixed uniform mesh based on the maximum and minimum possible resolution of the individual adaptive moving meshes in the ensemble. The resolution range in the adaptive moving mesh reflects the computational constraints adapted to the specific physical problem: it therefore behooves us to bring these constraints into the definition of the fixed mesh for the analysis.

The *high resolution* fixed reference mesh (HR) will be obtained by setting  $M = N_1$  and the *low resolution* fixed reference mesh (LR) by setting  $M = N_2$ . We will focus on these two particular fixed meshes, although the methodology described below could be adapted to working with any fixed reference mesh. Recalling that  $L = N_1\delta_1 = N_2\delta_2$ , and the criteria for a valid mesh given by (4), it can be seen that any valid mesh  $\{z_1, z_2, \dots, z_N\}$  will have at most one node in each cell  $L_i$  of an HR, and at least one node in each cell of an LR. As will be seen below, the HR case will require some interpolation to fill in empty cells,

whereas the LR case will average physical values at nodes that share a cell. It may seem that the higher resolution mesh would always be preferable, but a key finding of this work is that this is not always true.

Note that the hypothesis  $L = N_1\delta_1 = N_2\delta_2$ , i.e. the tolerances  $\delta_1$  and  $\delta_2$  are divisors of the domain dimension  $L$ , does not need to be assumed. The computational/physical constraints of the model may suggest  $\delta_1$  and  $\delta_2$  not satisfying this condition; it would be a technical change in our method to accommodate such a situation.

## 5.2 Mapping onto a fixed reference mesh

The mapping will take a state vector  $\mathbf{x} = (u_1, u_2, \dots, u_N, z_1, z_2, \dots, z_N)$ , where  $\{z_1, z_2, \dots, z_N\}$  is a valid mesh, onto a vector in  $\mathbb{X}_M = \mathbb{R}^M \times V_M$  with  $M = N_1$  (HR) or  $M = N_2$  (LR). The state vector to which the map is applied should be thought of as an ensemble member at the forecast step, so that it has gone through remeshing after its final model evolution step. Thus  $N$  may be any integer between  $N_1$  and  $N_2$ . This is Step S<sub>1</sub> in the scheme of Fig. 3

We denote the mapping as  $\mathcal{P}_j : \mathbb{X} \mapsto \mathbb{X}_M$ , with  $M = N_1$  for  $j = 1$  (HR) or  $M = N_2$  for  $j = 2$  (LR) as above. Recalling that the  $\gamma_i$  are nodes of the fixed reference mesh, the image of a specific  $\mathbf{x} \in \mathbb{X}_N$  has the form,

$$\mathcal{P}_j(\mathbf{x}) = (\tilde{u}_1, \tilde{u}_2, \dots, \tilde{u}_M, \gamma_1, \gamma_2, \dots, \gamma_M). \quad (11)$$

The physical value  $\tilde{u}_i$  is viewed as the value of  $u$  at mesh node  $\gamma_i$ , the tilde is used hereafter to refer to quantities on the fixed reference mesh.

To set the  $u$ -values, we introduce a shifted mesh as follows: set  $\tilde{L}_i = [\gamma_i - \delta/2, \gamma_i + \delta/2)$  for  $i = 2, \dots, M$  where  $\delta = \delta_1$  or  $\delta_2$  and again  $M = N_1$  or  $N_2$ , respectively. Further, set  $\tilde{L}_1 = [0, \delta/2) \cup [L - \delta/2, L)$ . We view  $\tilde{L}_1$  as an interval since we identify 0 and  $L$ . The procedure is now separated into the high and low resolution cases.

Case 1 - HR: Taking  $\mathbf{x} \in \mathbb{X}_N$  as above, if there is a  $z_k \in \tilde{L}_i$  then set  $\tilde{u}_i = u_k$ . If there is no  $z_k \in \tilde{L}_i$  but there is a  $z_k < \gamma_i$  then find  $k$  so that  $z_k < \gamma_i < z_{k+1}$  and set

$$\tilde{u}_i = \frac{u_k + u_{k+1}}{2}. \quad (12)$$

If there is no such  $z_k$ , then set

$$\tilde{u}_i = \frac{u_1 + u_{N_1}}{2}. \quad (13)$$

Case 2 - LR: For each  $i$ , find all  $z_k \in \tilde{L}_i$ . Denote these  $z_{k_i}, \dots, z_{k_i+n_i}$  and set

$$\tilde{u}_i = \frac{1}{n_i} \sum_{j=k_i}^{k_i+n_i} u_j. \quad (14)$$

The map  $\mathcal{P}_j$  is now well defined, in both the HR and LR cases, for each  $\mathbf{x} \in \mathbb{X}_N$ .

For the EnKF, we will also need the map that omits the mesh points in the fixed reference mesh:

$$\tilde{\mathcal{P}}_j(\mathbf{x}) = (\tilde{u}_1, \tilde{u}_2, \dots, \tilde{u}_M), \quad (15)$$

and again  $M = N_1$  or  $N_2$  for HR or LR, respectively.

In the EnKF analysis, we will denote  $\tilde{\mathcal{P}}_j(\mathbf{x})$  by  $\tilde{\mathbf{u}}$  and work with this reduced state vector which consists only of the physical values and not the mesh points. A consequence is that we will not be updating the mesh locations, but rather re-mapping the analysis back onto the original adaptive mesh for each ensemble member. We will discuss the possibility of updating the mesh locations in the conclusions.

### 5.3 Observation operator

The observations will be of physical values ( $\mathbf{u}$ ) at specific locations ( $\mathbf{z}^o$ ). Assume there are  $d$  observations, then the observation operator will be a mapping on reduced state vectors  $\tilde{\mathbf{u}} = (\tilde{u}_1, \tilde{u}_2, \dots, \tilde{u}_M)$  given as  $\mathbf{y} = \mathcal{H}(\tilde{\mathbf{u}})$ , i.e.,  $\mathcal{H} : \mathbb{R}^M \mapsto \mathbb{R}^d$  with  $M = N_1$  or  $N_2$ . Each component of  $\mathcal{H}(\tilde{\mathbf{u}})$  is the estimate the state vector  $\tilde{\mathbf{u}}$  gives of the observations at locations  $\mathbf{z}^o$ . For the explicit representation of the observation operator, let consider one observation at once, so that for all  $1 \leq j \leq d$  we consider the  $j$ -th observation and find  $i$  so that  $z_j^o \in L_i$ ; then the  $j$ -th component of the observation operator reads:

$$h_j(\tilde{\mathbf{u}}) = \tilde{u}_i + \frac{z_j^o - \gamma_i}{\gamma_{i+1} - \gamma_i} (\tilde{u}_{i+1} - \tilde{u}_i). \quad (16)$$

Since  $\gamma_i \leq z_j^o < \gamma_{i+1}$ , this is the natural linear interpolation between values of  $\mathbf{u}$  at  $\gamma_i$  and  $\gamma_{i+1}$ . The full observation operator is then

$$\mathcal{H}(\tilde{\mathbf{u}}) = (h_1(\tilde{\mathbf{u}}), h_2(\tilde{\mathbf{u}}), \dots, h_d(\tilde{\mathbf{u}})), \quad (17)$$

where each  $h_j(\tilde{\mathbf{u}})$  has the above form of an observation value at their respective observation locations  $z_j^o$ .

Thus, we can eventually define the state vector on  $\tilde{\Gamma}$  as

$$\tilde{\mathbf{w}}(t) = \begin{pmatrix} \tilde{\mathbf{x}}(t) \\ \tilde{\mathbf{z}}(t) \end{pmatrix} = \left[ \tilde{\mathbf{x}}_1(t) \tilde{\mathbf{x}}_2(t) \dots \tilde{\mathbf{x}}_{M-1}(t) \tilde{\mathbf{x}}_M(t) \tilde{z}_1(t) \tilde{z}_2(t) \dots \tilde{z}_{M-1}(t) \tilde{z}_M(t) \right]^T \quad (18)$$

### 5.4 Analysis using the ensemble Kalman filter

After mapping all the ensemble members onto the dedicated fixed reference mesh (either the high- or the low-resolution one), the stochastic EnKF can be applied in the standard way. This is Step S<sub>2</sub> in our scheme. The mapped forecast ensemble members can be stored as columns on the forecast ensemble matrix

$$\mathbf{E}^f = \left[ \tilde{\mathbf{u}}_1^f, \dots, \tilde{\mathbf{u}}_{N^e}^f \right] \in \mathbb{R}^{M \times N^e}, \quad (19)$$

with  $M = N_1$  or  $M = N_2$  for HR and LR reference mesh, respectively,  $N^e$  being the ensemble size. To simplify the notation the time index and the tilde from the matrices are omitted: all terms entering the analysis update operations are defined at the same analysis time onto the fixed, either HR or LR, mesh. The forecast ensemble mean is computed as

$$\bar{\mathbf{u}}^f = \frac{1}{N^e} \sum_{n=1}^{N^e} \tilde{\mathbf{u}}_n^f, \quad (20)$$

while the normalized forecast anomaly matrix  $\mathbf{X}^f$  is formed by subtracting the forecast ensemble mean from each of the ensemble members as

$$\mathbf{X}^f = \frac{1}{\sqrt{N^e - 1}} \left[ \tilde{\mathbf{u}}_1^f - \bar{\mathbf{u}}^f, \dots, \tilde{\mathbf{u}}_{N^e}^f - \bar{\mathbf{u}}^f \right]. \quad (21)$$

Model outputs are confronted with the observations at the end of every analysis interval, and are stored in the observation  
5 vector,  $\mathbf{y} \in \mathbb{R}^d$ . The observations are related to the system state via the (generally nonlinear) observational model

$$\mathbf{y} = \mathcal{H}(\tilde{\mathbf{u}}) + \boldsymbol{\epsilon} \quad (22)$$

and are assumed affected by a Gaussian, zero-mean white-in-time noise  $\boldsymbol{\epsilon}$  with covariance  $\mathbf{R} \in \mathbb{R}^{d \times d}$ ,  $\boldsymbol{\epsilon} \sim \mathcal{N}(\mathbf{0}, \mathbf{R})$ . In the  
experiments described in Sect. 7, we directly observe the model physical variables (onto the fixed reference mesh),  $\tilde{\mathbf{u}}$ , so that  
as explained in Sect. 5.3, the observation operator only involves a linear interpolation and is thus linear. Nevertheless, the  
10 approach herein described is suitable to work with nonlinear  $\mathcal{H}$  subject to minor modifications.

In the stochastic EnKF (Burgers et al., 1998), the observations are treated as random variables, so that each ensemble member  
assimilates a different perturbed observations vector

$$\mathbf{y}_n = \mathbf{y} + \boldsymbol{\epsilon}_n, \quad 1 \leq n \leq N^e, \quad (23)$$

with  $\boldsymbol{\epsilon}_n \sim \mathcal{N}(\mathbf{0}, \mathbf{R})$ . We can now compute the normalized anomaly ensemble of the observations

$$\begin{aligned} \mathbf{Y}_o &= \frac{1}{\sqrt{N^e - 1}} \left[ \mathbf{y}_1 - \mathbf{y}, \dots, \mathbf{y}_{N^e} - \mathbf{y} \right] \\ &= \frac{1}{\sqrt{N^e - 1}} \left[ \boldsymbol{\epsilon}_1, \dots, \boldsymbol{\epsilon}_{N^e} \right], \end{aligned} \quad (24)$$

and define the ensemble-based observational error covariance matrix,

$$\mathbf{R}^e = \mathbf{Y}_o (\mathbf{Y}_o)^T, \quad (25)$$

and the observed ensemble-anomaly matrix,

$$\mathbf{Y} := \mathcal{H}(\mathbf{E}^f) - \mathcal{H}(\bar{\mathbf{E}}^f), \quad (26)$$

20 with  $\bar{\mathbf{E}}^f = \bar{\mathbf{u}}^f \mathbf{1}$  and  $\mathbf{1} = [1, \dots, 1]^T \in \mathbb{R}^M$ . The forecast ensemble member are then individually updated according to

$$\tilde{\mathbf{u}}_n^a = \tilde{\mathbf{u}}_n^f + \mathbf{K} [\mathbf{y}_n - \mathcal{H}(\tilde{\mathbf{u}}_n^f)], \quad 1 \leq n \leq N^e, \quad (27)$$

where

$$\mathbf{K} = \mathbf{X}^f \mathbf{Y}^T \left[ \frac{1}{N^e - 1} \mathbf{Y} \mathbf{Y}^T + \mathbf{R}^e \right]^{-1} \quad (28)$$

is the ensemble-based Kalman gain matrix. It is worth recalling that in the limit,  $N^e \rightarrow \infty$ ,  $\mathbf{R}^e \rightarrow \mathbf{R}$  and the Kalman gain,  $\mathbf{K}$   
25 converges to that of a classical, full rank, Kalman filter if both the dynamical and the observational models are linear and all of  
the errors are Gaussian.

When applied to large dimensional systems, for which  $N^e \ll M$  as typical in the geosciences, the success of the EnKF is related to the use of localization and inflation (see, e.g. Carrassi et al., 2018, their Sect. 4.4 for a review). In this work localization is not used, but the covariance multiplicative scalar inflation (Anderson and Anderson, 1999) is adopted, so that the ensemble-based forecast anomaly matrix is inflated as

$$5 \quad \mathbf{X}^f \mapsto \alpha \mathbf{X}^f \tag{29}$$

with  $\alpha \geq 1$ , before  $\mathbf{X}^f$  is used in the analysis update Eq. (27). Multivariate multiplicative inflation or more sophisticated adaptive inflation procedures exist and could have been implemented here, but this is not of great importance in this work, and the scalar coefficient  $\alpha$  has been properly tuned. A recent review of adaptive inflation methods can be found in Raanes et al. (2019).

15 The updated analysis ensemble in Eq. (27) is then used to initialize the next forecast step. However, prior to this, we need to map back each individual analysis member on their respective adaptive, non-uniform, mesh; the process is described in Sect. 5.5.

### 5.5 From a fixed reference mesh to an adaptive moving mesh

After the analysis, the update on the fixed reference mesh has to be mapped back on the individual adaptive moving meshes of the ensemble members. In forward mapping step  $S_1$  (see Fig. 3), the mapping indices associating the nodes in the adaptive moving mesh with nodes in the reference mesh, are stored in an array. These are the indices resulting from the projections on the HR or the LR reference mesh as described in Sect. 5.2.

Each analysis ensemble member  $\tilde{\mathbf{u}}_n^a$  will thus retrieve its adaptive mesh  $(z_1, z_2, \dots, z_{N(n)})$  from the stored array. In the reverse mapping step  $S_3$  (Fig. 3) the updated solution is projected to the adaptive moving meshes by locating each  $z_j$  in an interval  $\tilde{L}_m$  and assigning the  $m^{\text{th}}$  component of  $\tilde{\mathbf{u}}_n^a$  to be the  $i^{\text{th}}$  component of  $u$  in the vector  $\mathbf{x}_k$  that will initialize the model after the analysis time step.

In summary, each ensemble member after the analysis step will have the form:

$$\mathbf{x}_k = (u_1, u_2, \dots, u_N, z_1, z_2, \dots, z_N) \tag{30}$$

where if  $z_i \in \tilde{L}_m$ , then  $u_i = \tilde{\mathbf{u}}(\gamma_m)$ . The backward mapping procedure is the same for both HR and LR cases, although it will provide different results.

The process steps  $S_1 \rightarrow S_2 \rightarrow S_3$  are illustrated in Fig. 4a/b, representing HR/LR cases, respectively, for one ensemble member, and using the Burgers' equation as model (Burgers, 1948); the model and experimental setup are described in details in Sect. 6.

Let consider first the HR case of Fig. 4a. In  $S_1$ , the forecasted physical quantity  $\mathbf{u}^f$  on the adaptive moving mesh (dark blue with large circles) is mapped to the fixed reference mesh nodes (light blue with small circles) at  $\gamma_{m-1} = 0.68$  and  $\gamma_{m+1} = 0.70$ . The fixed mesh's node  $\gamma_m = 0.69$  is left emptied : a value is thus assigned by interpolation from the adjacent nodes  $\gamma_{m-1}$  and  $\gamma_{m+1}$ . This provides the forecasted physical quantity,  $\tilde{\mathbf{u}}^f$ , on the full reference mesh and completes step  $S_1$ . In the



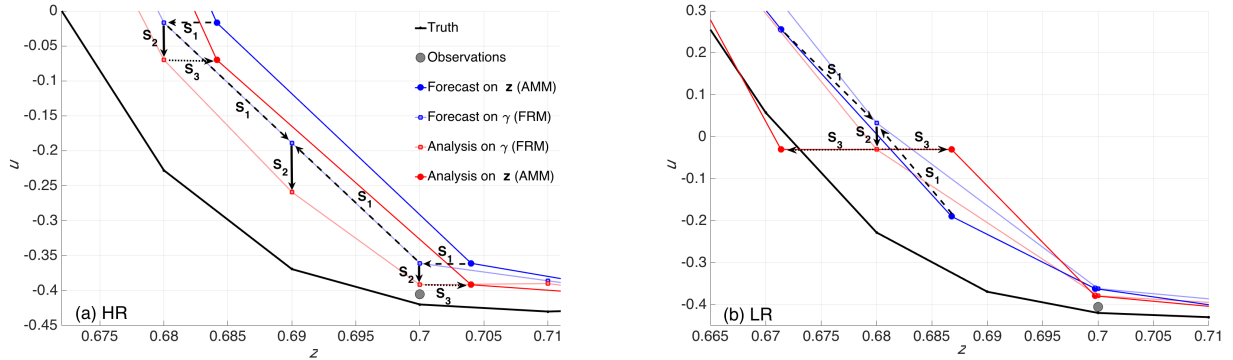

**Figure 4.** Schematic illustration of the DA cycle on the high resolution (a) and low resolution (b) fixed reference mesh. On the legend, dark and light blue/red lines are forecast/analysis on adaptive moving mesh (AMM) and fixed reference mesh (FRM), respectively. Observations (gray circles) are sampled from the truth (black line). Following the arrows:  $S_1$  is the mapping the adaptive moving mesh on to the fixed reference mesh,  $S_2$  is update of the ensemble member,  $S_3$  is backward mapping on the adaptive moving mesh (see Fig. 3).

next step,  $S_2$ ,  $\tilde{u}^f$  is updated using the stochastic EnKF as described in Sect. 5.4 to get the analysis field  $\tilde{u}^a$  (light red line and small circles). Finally, in step  $S_3$ , the  $\tilde{u}^a$  is mapped back to the adaptive moving mesh so as to get  $u^a$  (dark red line with large circles). Note that, the physical quantity on the interpolated node  $\gamma_m$  in the fixed reference mesh is not mapped back (that node “did not exist” in the original adaptive mesh) yet it was required at step  $S_2$  to perform the analysis.

- 5 Similarly, Fig. 4b describes the LR case. In this situation however, the forecasted physical quantity on the adaptive moving mesh nodes at 0.672 and 0.686 are averaged (step  $S_1$ ) in order to associate a value on the fixed reference mesh node  $\gamma_m = 0.68$  before the analysis. After the update (step  $S_2$ ), in step  $S_3$  the analysis  $\tilde{u}_m$  at  $\gamma_m = 0.68$  is used to provide the analyses on both the original nodes (at 0.672 and 0.686) on the adaptive mesh that will have thus the same analyzed value. As a result of this, we observe that the analysis is better than the forecast (in the sense of being closer to the truth: compare dark blue/red circles, respectively, for forecast and analyses) at node  $z = 0.672$  but worse at node  $z = 0.686$ . In this latter case in fact, the overestimate of the truth passes from about 0.15 to more than 0.3 for the forecast and analysis, respectively. On the other hand, at node  $z = 0.672$  the forecasted overestimate of about 0.2 is reduced to a slight underestimate of about 0.04.
- 10

- We remark a key aspect of our methodological choice: the ratio of the remeshing criteria  $\frac{\delta_2}{\delta_1}$  exerts a control on the relation between the adaptive moving meshes and the fixed reference mesh. In fact,  $\frac{\delta_2}{\delta_1}$  is the upper bound of the number of nodes that
- 15 will be interpolated in the HR case, and averaged in the LR case respectively, since it represents the maximum ratio between the dimension of the fixed reference mesh and that a moving mesh can ever reach.

## 6 Experimental setup

Our aim is to test the modified EnKF methodology described in Sect. 5 by performing controlled DA experiments with two numerical models and two types of synthetic observations: Eulerian and Lagrangian. In particular, we aim at assessing the impact and comparing the performance of the HR and LR options detailed in Sect. 5.

5 The first numerical model is the diffusive version of Burgers' equation (Burgers, 1948)

$$\frac{\partial u}{\partial t} + u \frac{\partial u}{\partial z} = \nu \frac{\partial^2 u}{\partial z^2}, \quad z \in [0, 1), \quad t \in (0, T] \quad (31)$$

with periodic boundary conditions  $u(0, t) = u(1, t)$ . In our experiments, we set the viscosity  $\nu = 0.08$ ; the model Eq. (31) is hereafter referred to as BGM. Given that Burgers' equation can be solved analytically, it has been used in several DA studies (see, e.g. Cohn, 1993; Verlaan and Heemink, 2001; Pannekoucke et al., 2018).

10 As second model, we use an implementation of Kuramoto-Sivashinsky equation (Papageorgiou and Smyrlis, 1991)

$$\frac{\partial u}{\partial t} + \nu \frac{\partial^4 u}{\partial z^4} + \frac{\partial^2 u}{\partial z^2} + u \frac{\partial u}{\partial z} = 0, \quad z \in [0, 2\pi), \quad t \in (0, T] \quad (32)$$

which is also given periodic boundary conditions, and is referred to as KSM throughout the text. Concentration waves, flame propagation and free surface flows are among the problems for which this equation is used. The higher-order viscosity,  $\nu$ , is chosen as 0.027 which makes Eq. (32) display chaotic behavior (Papageorgiou and Smyrlis, 1991). Both numerical models are  
 15 discretised using finite central differences and integrated with an Eulerian time-stepping scheme. We integrate them using very small time-steps,  $10^{-3}$  and  $10^{-5}$  for BGM and KSM, respectively, since the equations are propagated forward explicitly. For the BGM, the remeshing criteria for mesh adaptation are  $\delta_1 = 0.01$  and  $\delta_2 = 0.02$ , while they are  $\delta_1 = 0.02\pi$  and  $\delta_2 = 0.04\pi$  for the KSM. Given that the model domain has dimension  $L = 1$  and  $L = 2\pi$  for BGM and KSM, respectively, this implies that the number of nodes in the HR/LR fixed reference mesh for the analysis is 100/50 for both BGM and KSM.

20 Two "nature runs" are obtained, one for each model, by integrating them on a high resolution fixed uniform mesh. For both models, the meshes for the nature are intentionally chosen to be of at least the same resolution of the HR fixed uniform reference mesh of the analysis. The size of the nature run's mesh for the BGM is 100 (corresponding to a resolution of 0.01), while it is 120 for KSM (equivalent to a resolution of about 0.052).

We have limited the time length of the simulations in BGM to  $T = 2$  as the viscosity tends to dominate over longer times  
 25 and dampen the wave motion. Figure 5a shows the nature run for BGM until  $T = 2$  with the initial condition

$$u(z, 0) = \sin(2\pi z) + \frac{1}{2} \sin(\pi z). \quad (33)$$

The figure shows clearly how the amplitude of the wave, picking around  $z = 0.5$  at initial time, is almost completely dampened out at the final time.

With the given choice of the viscosity, KSM is not as dissipative as BGM and simulations can be run for longer. KSM is  
 30 initialized using

$$u(z, 0) = -\sin(2\pi z) \quad (34)$$

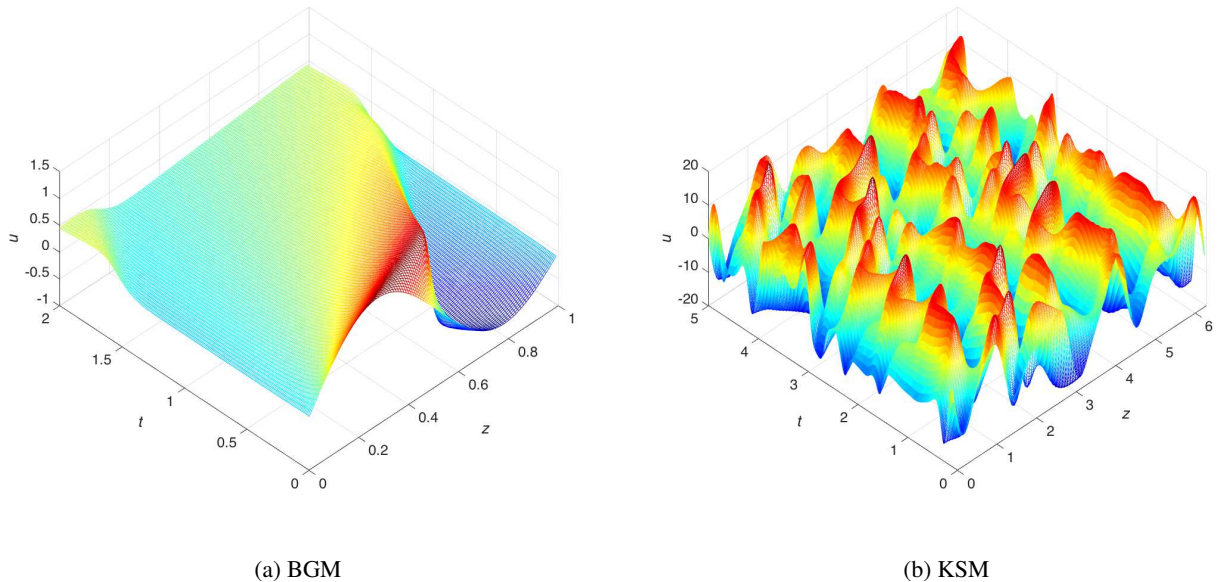

**Figure 5.** Numerical solutions of Burgers' and Kuramoto-Sivashinsky equations. The solutions are computed on an uniform fixed mesh, and represent the nature run from which synthetic Eulerian and Lagrangian observations are sampled.

as initial condition. Then, it is spun-up until  $T = 20$  and the solution at  $T = 20$  is used as initial condition for the DA experiments. Figure 5b shows the KSM nature run until  $t = 5$  after re-initialization of the model following the spin-up (i.e. the actual simulation time being  $T + t = 25$ ); the chaotic behavior of the KSM solution can be qualitatively identified by the random-like oscillations.

5 Synthetic Eulerian and Lagrangian observations are sampled from the nature run. Eulerian observations are always collected at the same, fixed-in-time, locations of the domain. We assume that Eulerian observers are evenly distributed along the one-dimensional domain (i.e. observations are at equally spaced locations) and that their total number is constant, so the number of observations at time step  $t_k$ ,  $d^{EUL}(t_k) = d_k^{EUL} = d$  for all  $k > 0$ . The locations of the Lagrangian observations, on the other hand, change in time: the data are sampled by following the trajectories, solutions of the model. Being advected by the

10 flow, Lagrangian observations may eventually concentrate within a small area of the model domain; they can thus be more spatially localized compared to Eulerian observations. In our experiments with Lagrangian observations, if two observations come within the threshold distance,  $10^{-3}$ , the one closer to the upper boundary of the spatial domain is omitted from the assimilation at that and all future observation times so as not to over-sample a specific location. As a result, the total number of Lagrangian observations will tend to decrease in time. An illustration of the different spatial coverage provided by the Eulerian

15 and Lagrangian observations is given in Fig. (6), for the BGM model with  $d^{EUL} = d_0^{LAG} = 10$  on the mesh of the nature run.

In the experiments that follow, we have chosen to deploy as many Lagrangian observers at  $t_0$  as Eulerian ones and to place them at the same locations, i.e.  $d_0 = d$ . The number of Eulerian observations, and the initial number of Lagrangian

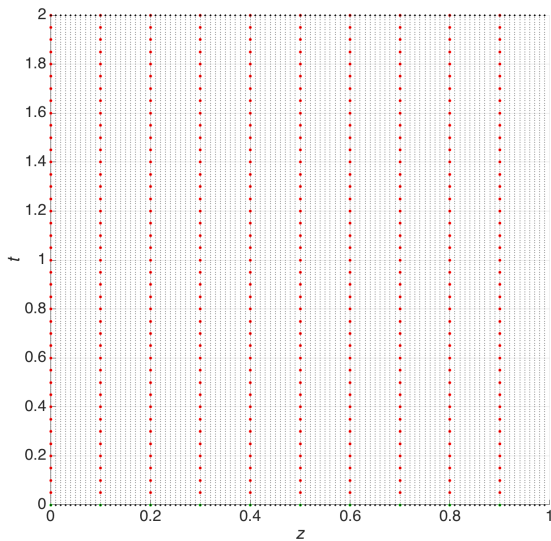

(a) Eulerian Observations

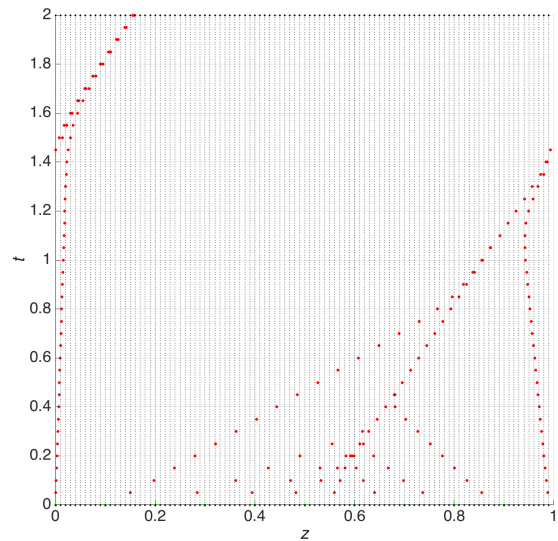

(b) Lagrangian Observations

**Figure 6.** Observations sampled from the BGM nature run (see Fig. 5a) in Eulerian **(a)** and Lagrangian **(b)** manner, mimicking geo-stationary satellite and buoy measurements, respectively.

**Table 1.** Experimental setup parameters:  $\nu$  is the viscosity,  $\delta_1$  and  $\delta_2$  the remeshing criteria,  $N_1$  and  $N_2$  the number of nodes in the HR and LR fixed reference mesh,  $T$  the duration of the experiments,  $\Delta t$  the analysis interval,  $d^{\text{EUL}}$  and  $d_0^{\text{LAG}}$  the number of Eulerian observations and the initial number of Lagrangian observations.

|     | $\nu$ | $\delta_1/\delta_2$ | $N_1/N_2$ | $T$ | $\Delta t$ | $d/d_0$ | $\sigma_o$ |
|-----|-------|---------------------|-----------|-----|------------|---------|------------|
| BGM | 0.008 | 0.01 / 0.02         | 100 / 50  | 2   | 0.05       | 10      | 0.01       |
| KSM | 0.027 | $0.02\pi / 0.04\pi$ | 100 / 50  | 5   | 0.05       | 20      | 0.78       |

observations, is set to  $d^{\text{EUL}} = d_0^{\text{LAG}} = 10$  and  $d^{\text{EUL}} = d_0^{\text{LAG}} = 20$  for BGM and KSM, respectively. Gaussian, white-in-time, spatially uncorrelated noise is added to these observations; the observational error covariance matrix is diagonal, so that  $\mathbf{R} = \sigma_o^2 \mathbf{I}$ , with  $\sigma_o$  being the observational error standard deviation, and  $\mathbf{I}$  the identity matrix. These synthetic observations are assimilated with the modified EnKF presented in Sect. 5.4, and the specifications of its implementation, namely the number of initial ensemble members, initial mesh size, and inflation, are provided in the Sect. 7. The analysis interval is set to  $\Delta t = 0.05$  time units in all the DA experiments and for both models [and observation types](#). A summary of the experimental setup is given in Table 1.

The experiments are compared by looking at the root mean square error (RMSE) of the ensemble mean (with respect to the nature run) and the ensemble spread. Since the analysis is performed on either the HR or the LR fixed mesh, the computation of

the RMSE and spread is done on the mesh resulting from their intersection. Given that we have chosen the remeshing criteria in both models such that  $\delta_1$  is half of  $\delta_2$ , the intersection mesh is the LR mesh itself. Finally, in all of the experiments, the time-mean of the RMSE and spread are computed after  $T = 1$  time units, unless stated otherwise.

## 7 Results

- 5 We present the results in three subsections. In Sect. 7.1 and 7.2, we investigate the modified EnKF with fixed reference mesh (either HR or LR), for the BGM and KSM, respectively, using Eulerian observations. In these sections we also present the tuning of the EnKF with respect to the ensemble size ( $N^e$ ), inflation factor ( $\alpha$ ) and initial adaptive moving mesh size ( $N_0$ ). The combination of those parameters giving the best performance with BGM is then kept and used in Sect. 7.3 where the comparison between Eulerian and Lagrangian observations cases is described.
- 10 **7.1 Modified EnKF for adaptive moving mesh models - Burgers' equation**

In this section, the experiments using BGM are presented. In order to calculate the base error due to the choice of the specific fixed reference mesh, HR or LR, and the resulting mapping procedures, we first perform an ensemble run without assimilation. This DA-free ensemble run is subject to all of the steps described in Fig. 3 except for step  $S_2$  in which the analysis update is performed. Given that DA is not carried out, the difference between the HR and LR experiments (if any) can only be due to the mapping procedures. Recall that this procedure differs in that it involves interpolation or averaging in the HR or LR cases, respectively. For consistency, the mapping to/from the fixed reference mesh is performed every  $\Delta t = t_{k+1} - t_k$ , i.e. the time between the assimilation of observations.

Figure 7 displays the RMSE and the ensemble spread for the HR and LR in these DA-free ensemble runs. We see that the RMSE is slightly larger in the LR than in the HR case, indicating that averaging introduces larger errors than interpolation in this specific model scenario. This can be interpreted in terms of the sharpness of the Burgers' solution (cf Fig. 5a) that might not be accurately described using the LR mesh. Furthermore, this is also consistent with what is observed in Fig. 4b, in which the LR analysis was deteriorating the forecast in some instances. After an initial faster error growth in the LR case, at about  $t = 0.4$ , the difference between LR and HR almost stabilizes, with the two error curves having the same profile. The ensemble spread is initially slightly larger in the HR case but it then attains similar values for both HR and LR after  $t = 0.6$ , suggesting that the spread does not depend critically on the type of mapping and resolutions of the fixed reference mesh. While this appears to be a reasonable basis for building the EnKF, Fig. 7 also highlights the undesirable small spread of values compared with the RMSE. We will come back to this point in the DA experiments to follow.

In the DA experiments, we study the sensitivity of the EnKF to the ensemble size, inflation factor and initial size of the adaptive moving meshes. Recall that the ensemble members are all given the same uniform mesh at the initial time; however these meshes will then inevitably evolve into a different, generally non uniform, mesh for each member. We remark that the three parameters under consideration are all interdependent and a proper tuning would involve varying them simultaneously,

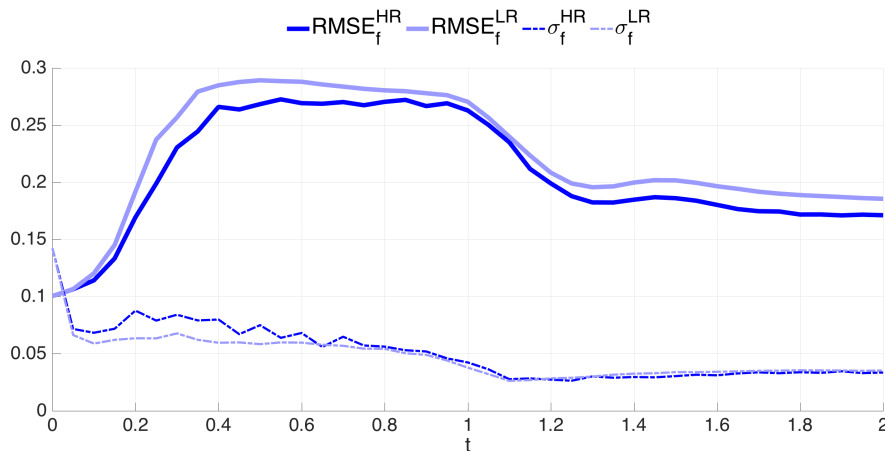

**Figure 7.** Time evolution of the forecast RMSE (solid line) and spread ( $\sigma$ , dashed line) of DA-free ensemble run using BGM. Dark and light blue lines represent the HR and LR, respectively.

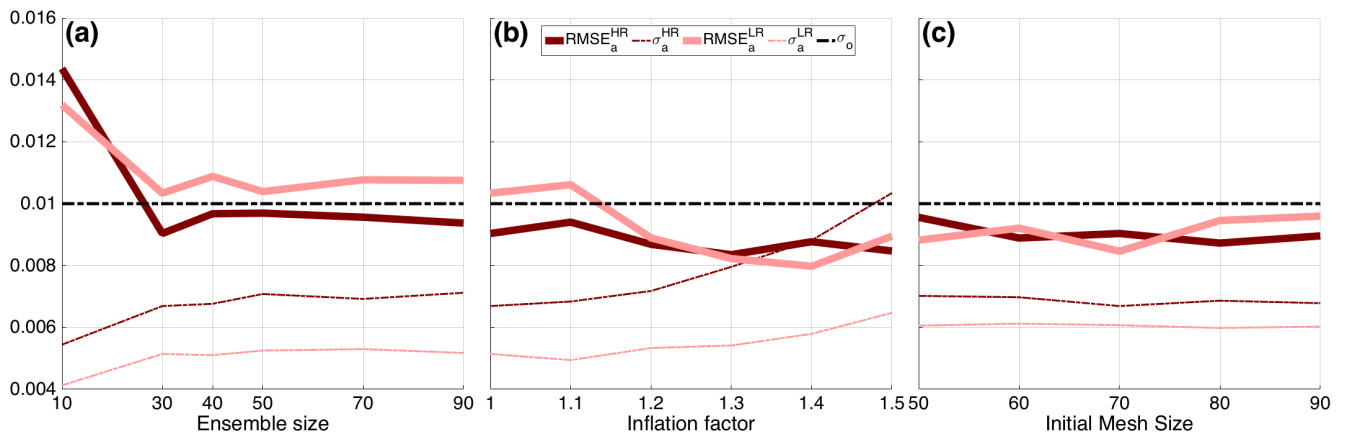

**Figure 8.** Time-mean of the RMSE of the analysis ensemble mean (solid line) and ensemble spread ( $\sigma$ , dashed line) of BGM for different ensemble size,  $N^e$  (a); inflation factor,  $\alpha$  (b); and initial mesh size,  $N_0$  (c). Dark and light red show the HR and LR, respectively.

which would make the number of experiments grow too much. To reduce the computational burden, we have opted instead to vary only one at a time, while keeping the other two fixed.

The results of this tuning are displayed in Fig. 8, that shows the RMSE of the EnKF analysis (the ensemble mean), and the spread, as a function of the ensemble size, inflation factor and initial mesh size, respectively in panels **a**, **b** and **c**. The RMSE and spread are averaged in space and time, after the initial spin-up period  $T = 1$ . For reference, we have also plotted the observational error standard deviation (horizontal black dashed line).

**Table 2.** Ensemble size ( $N^e$ ), inflation factor ( $\alpha$ ) and initial mesh size ( $N_0$ ) chosen from the sensitivity experiments in Fig. 8 to perform the experiment in Fig. 9. Resulting time mean of the RMSE and spread ( $\sigma$ ) in for the HR and LR using BGM between  $t = 0$  and 2 are also listed.

| BGM | $N^e$ | $\alpha$ | $N_0$ | RMSE <sub>f</sub> | RMSE <sub>a</sub> | $\sigma_f$ | $\sigma_a$ |
|-----|-------|----------|-------|-------------------|-------------------|------------|------------|
| HR  | 30    | 1.0      | 70    | 0.025             | 0.023             | 0.026      | 0.015      |
| LR  | 30    | 1.45     | 70    | 0.018             | 0.017             | 0.023      | 0.014      |

In the case of the sensitivity to the ensemble size (Fig. 8a),  $N^e$  is varied between 10 and 90, while the initial mesh size is kept to 70 for both HR and LR cases, and inflation is not used (i.e.,  $\alpha = 0$ ). The RMSE in the HR case is generally lower than in the LR case, which are respectively slightly below and above the observational error standard deviation. In both cases, however, the RMSE approximately converges to quasi-stationary values as soon as  $N^e \geq 30$ . This phenomenon, that we also observe for KSM in the next section, is reminiscent of the behavior in a chaotic system, where the EnKF error converges when  $N^e$  is larger or equal to the dimension of the unstable-neutral subspace of the dynamics (Bocquet and Carrassi, 2017).

We therefore set  $N^e = 30$  and study the sensitivity to the inflation factor in Fig. 8b (the initial mesh size is still kept to 70). Inflation is expected to mitigate the difference (the underestimation) between the RMSE and the spread shown in Fig. 8a. By looking at Fig. 8b this seems actually to be the case and in the LR case, the RMSE/spread decreases/increases by increasing the inflation factor  $\alpha$ . In the HR case, the RMSE is already lower than the observational standard deviation and the inflation has only a small effect: the increase of spread is not accompanied by a similar decrease of error. Based on this, we hereafter set the inflation to  $\alpha = 1$  and  $\alpha = 1.45$  for HR and LR, respectively.

Finally, in Fig. 8c, we consider the initial mesh size; recall that the ensemble size is set to  $N^e = 30$ . Also recall that the size of the individual member's adaptive moving mesh size,  $N$ , is controlled by the remeshing tolerances  $\delta_1 = 0.01$  and  $\delta_2 = 0.02$  and can vary throughout the integration between 50 and 100. In the set of experiments depicted in Fig. 8c, we initialize the ensemble on an adaptive moving mesh of size  $N_0$  ranging from 50 to 90. Interestingly, the EnKF does not exhibit great sensitivity to  $N_0$  and the differences between HR and LR appear to be very small and not systematic. The fact that LR kept the RMSE at the level of the HR is the result of successful tuning. We saw in fact that the mapping error in the LR case is larger (cf Fig. 7). Nevertheless this initial disadvantage of the LR has been largely compensated by the inflation. In the experiments that follow, we have chosen to fix  $N_0 = 70$  for both HR and LR.

The results of the tuning experiments of Fig. 8 and selected values of the parameters are reported in Table 2, and are used in the experiments of Fig. 9 that shows the forecast/analysis RMSE and spread for both HR and LR as a function of time. Notably the HR and LR perform quite similarly for  $t > 1.2$ , when the solution of the model is possibly of small amplitude due to the viscous damping. Nevertheless, for  $t \leq 1.2$ , LR is often as good as ( $t < 0.4$ ) or better ( $0.4 \leq t \leq 1.2$ ) than HR, making LR a viable, computationally more economic, solution. The time-averaged RMSE and spread of these experiments are included in Table 2.

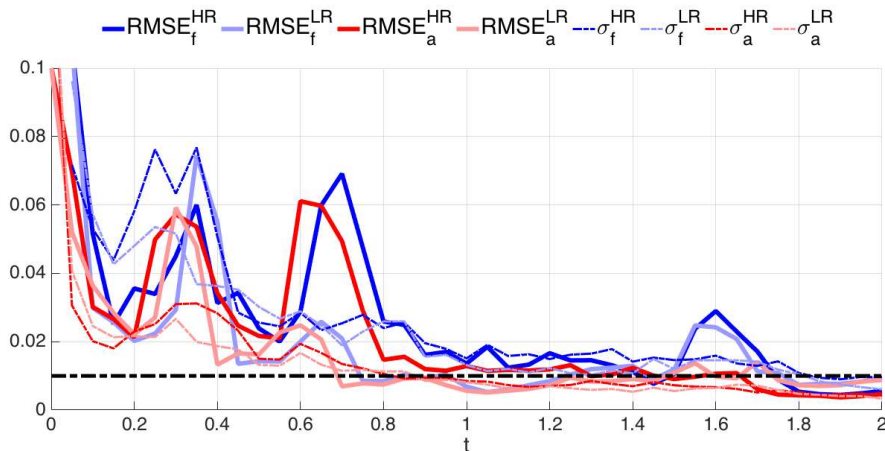

**Figure 9.** Time evolution of the RMSE (solid line) and spread ( $\sigma$ , dashed line) for BGM until  $t=2$ . Dark and light lines represent the HR and LR, respectively. Blue and red show forecast and analysis, respectively.

## 7.2 Modified EnKF for adaptive moving mesh models - Kuramoto-Sivashinsky equation

This section shows the same type of results as in the previous section, this time applied to the KSM. We begin by evaluating the errors related to the mapping on the HR and LR case by running a DA-free ensemble; results are shown in Fig. 10.

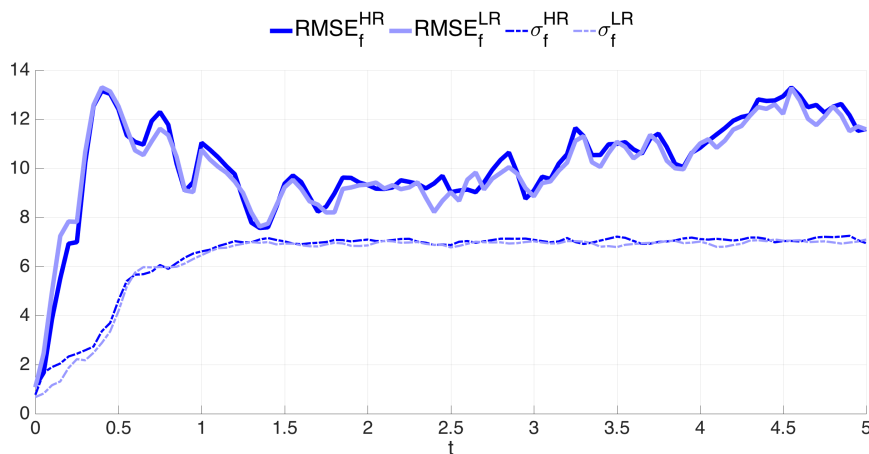

**Figure 10.** Same as Fig. 7 but using KSM

As opposed to what is observed in Fig. 7, we see now that the different mapping procedures in the HR and LR cases induce similar errors and impact the spread in a similar way. This difference is certainly due to the different dynamical behavior in BGM and KSM, with the solution of the latter displaying oscillations over all of the model domain. These can be, in some



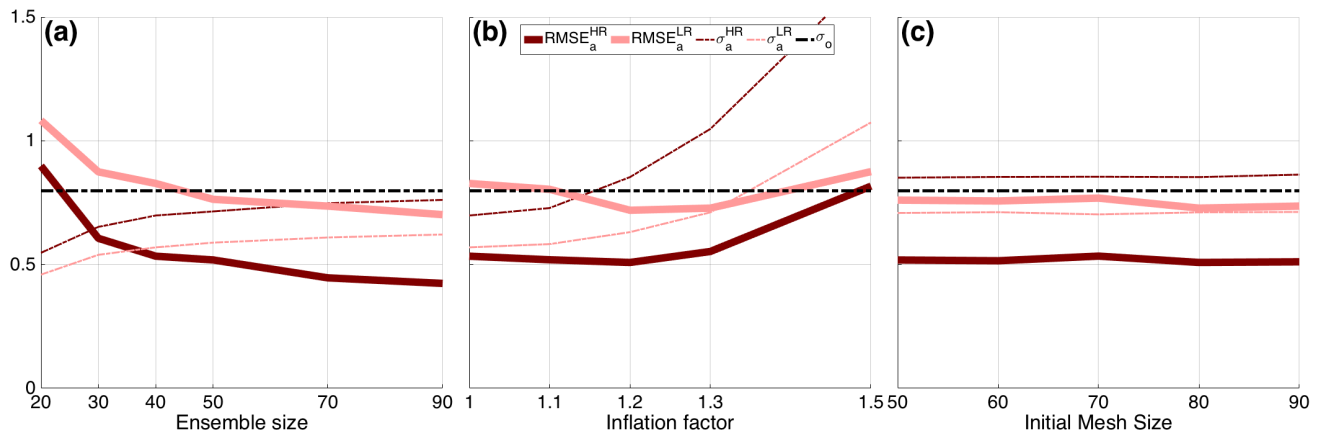

**Figure 11.** Same as Fig. 8 but using KSM.

instances, well represented (i.e., less affected) by the averaging procedure in the LR case, in others by the interpolation in the HR case. Another remarkable difference with respect to BGM is that now the ratio spread/RMSE is larger, meaning that the spread is underestimating the RMSE relatively less than for BGM.

Figure 11 shows the same set of experiments as in Fig. 8, this time using KSM. The time-mean of the RMSE and spread are again considered after  $t = 1$ , but experiments are run until  $t = 5$  since KSM is not as dissipative as BGM with chosen values for the viscosity. Furthermore, all values are normalized using an estimate of the model internal variability based on the spin-up integration from  $t = 0$  to  $t = T = 20$  (see Sect. 6).

In Fig. 11a, the analysis RMSE and spread are shown against the ensemble size,  $N^e$ . No inflation is applied and initial mesh size is chosen to be 80 in both the HR and LR cases. The analysis RMSE goes below the observation error standard deviation as soon as  $N^e = 30$  in the HR case, but an ensemble as big as  $N^e = 50$  is required in the LR case. Based on these results, we have chosen to use  $N^e = 40$  for both cases as a trade-off between computational cost and accuracy, given that the RMSE in the LR case is very close to observational accuracy. Notably, the spread is quite large in both cases, even larger than the RMSE in the HR configuration. With  $N^e = 40$ , the impact of inflation is considered in Fig. 11b. We see here how the spread is consistently increased by increasing the inflation factor  $\alpha$  and the corresponding RMSEs decrease until  $\alpha = 1.3$  and increase afterward, possibly as a consequence of too much spread. The selected values for the inflation factor are  $\alpha = 1.2$  and 1.3 for the HR and LR cases, respectively. Fig. 11c studies the sensitivity to the initial mesh size,  $N_0$ . Similarly to what is observed for the BGM in Fig. 8c, the performance of the EnKF does not show a marked sensitivity to  $N_0$ : it is arguable that the mesh size of the individual members quickly adjust to the values with little memory of the initial dimension. In the experiments that follow, the initial mesh size is set to  $N_0 = 80$  in both HR and LR configurations. Overall Fig. 11 indicates that, as opposed to BGM, with KSM the EnKF on the HR fixed reference mesh is always superior to the LR fixed mesh. The selected optimal values of  $N^e$ ,  $\alpha$  and  $N_0$  are reported in Table 3.

**Table 3.** Same as Table 2 but using KSM deduced from experiments in Fig. 11

| KSM | $N^e$ | $\alpha$ | $N_0$ | RMSE <sub>f</sub> | RMSE <sub>a</sub> | $\sigma_f$ | $\sigma_a$ |
|-----|-------|----------|-------|-------------------|-------------------|------------|------------|
| HR  | 40    | 1.2      | 80    | 1.30              | 0.51              | 2.96       | 0.85       |
| LR  | 40    | 1.3      | 80    | 1.25              | 0.78              | 1.83       | 0.71       |

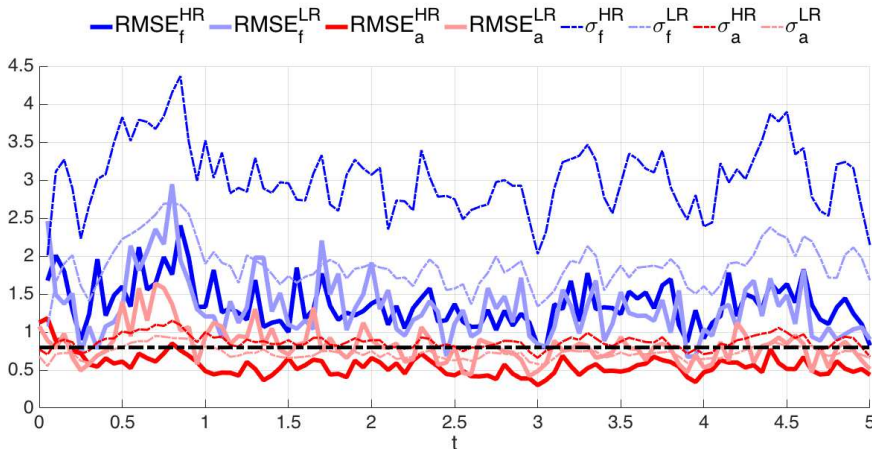

**Figure 12.** Same as Fig. 9, but using KSM.

Figure 12 shows the time evolution of the forecast and analysis RMSE and spread for HR and LR until  $t = 5$  using these selected values. First, we observe that the analysis RMSE is always lower than the corresponding RMSE of the forecast in both the HR and the LR cases. Remarkably the spread of the forecast is also larger than the RMSE of the forecast, in both configurations, pointing to healthy performance of the EnKF. As for the comparison between HR and LR we see that now the former is systematically better than the latter, suggesting that in the KSM, the benefit of performing the analysis on HR are larger compared to BGM. Nevertheless, the LR case also performs well, and it could well be preferred when computational constraints are taken into consideration. The time-averaged RMSEs and spreads are reported in Table 3.

### 7.3 Impact of observation type: Eulerian versus Lagrangian

Up to this point, we have only utilized Eulerian observations. Using the optimal setup presented in the previous sections, we now assess the impact of different observation types, i.e. Eulerian or Lagrangian (see Figs. 6a and 6b). We consider here only the BGM with the LR configuration for the fixed reference mesh and the values for the experimental parameters are those in Table 2 (first three columns of the second row). Results (not shown) with the KSM using Lagrangian observations indicate that the EnKF was not able to track the true signal, possibly as a consequence of the Lagrangian observers ending trapped within

only few of the many fronts in the KSM solution (see Fig. 5b): the number of observations and their distribution then becomes insufficient.

Figure 13 shows the forecast and analysis RMSE as a function of time, for both Eulerian and Lagrangian data. As for previous figures, the observation error standard deviation is superimposed as reference, but the number of Lagrangian observers is now included (right  $y$ -axis). Recall that Lagrangian data are bound to decrease with time (cf. Sect. 6 and Fig. 6b) and that their initial number and locations are the same as for the Eulerian observations, i.e.,  $d_0^{\text{EUL}} = d_0^{\text{LAG}} = 10$  and they are equally spaced.

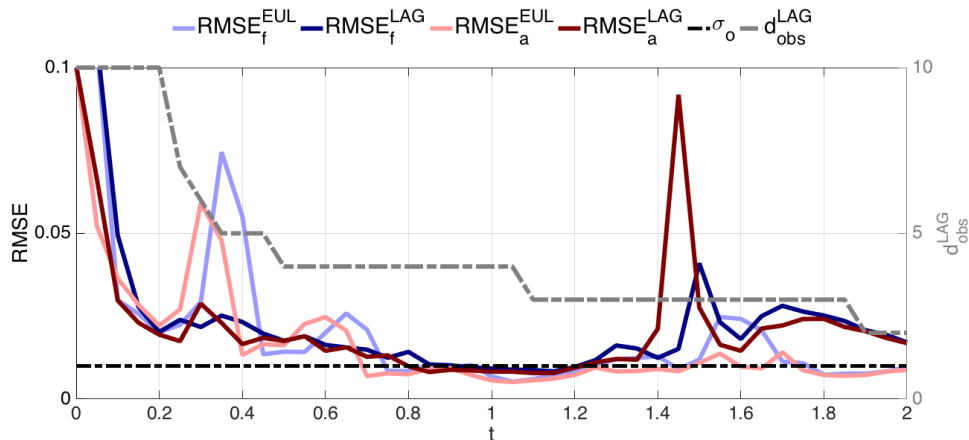

**Figure 13.** Time evolution of the RMSE until  $t = 2$  using BGM. Light blue and red lines are the forecast and analysis RMSE with the Eulerian observations, respectively. Dark blue and gray are, respectively, the same with the Lagrangian observations. Gray dashed line shows the number of Lagrangian observations in time.

At first sight, one can infer from Fig. 13 that overall Lagrangian data are approximately as effective as their Eulerian counterparts, even though they are fewer in number. This is reminiscent of a known advantage of Lagrangian observations that has been documented in a number of studies (see, e.g., Kuznetsov et al., 2003; Nodet, 2006; Apte and Jones, 2013; Slivinski et al., 2015, and references therein); although the actual positions at which the observations are assimilated in these pieces of work. A closer inspection of Fig. 13 reveals also other aspects. For instance, it is remarkable that between  $0.2 \leq t \leq 0.4$ , the assimilation of  $5 \leq d_{\text{obs}}^{\text{LAG}} \leq 10 = d_{\text{obs}}^{\text{EUL}}$  Lagrangian observations is superior to using  $d_{\text{obs}}^{\text{EUL}} = 10$  fixed, evenly distributed, Eulerian ones. On the other hand, when  $t \geq 1.3$ , the assimilation of Eulerian data is always better than Lagrangian, a behavior possibly due to the fact that  $d_{\text{obs}}^{\text{LAG}} \leq 3$  and that, despite their dynamically guided locations, they are not as many as required to properly keep the error low. It is finally worth pointing out that the episode of very high analysis RMSE (higher than the corresponding forecast RMSE) occurring at  $t = 1.5$ : the assimilation was in that case clearly detrimental. Nevertheless the EnKF was quickly able to recover and the RMSE is reduced to much smaller values, close to the observation error.

## 8 Conclusions

We propose a novel methodology to perform ensemble data assimilation with computational models that use non-conservative adaptive moving mesh. Meshes of this sort are said to be adaptive because their node locations adjust to some prescribed rule that is intended to improve model accuracy. We have focused here on models with a Lagrangian solver, in which the nodes  
5 move following the model's velocity field. They are said to be non-conservative because the total number of nodes in the mesh can itself change when the mesh is subject to remeshing. We have considered the case in which remeshing avoids having nodes too close or too far apart than given tolerance distances; in practice the tolerances define the set of valid meshes. When an invalid mesh appears through integration, it is then remeshed and a valid one is created.

The major challenge for ensemble data assimilation stands in that the dimension of the state space changes in time and differs  
10 across ensemble members, impeding the normal ensemble based operations (i.e., matrix computations) at the analysis update. To overcome this issue, we have added in our methodology one forward and one backward mapping step before and after the analysis respectively. This mapping takes all the ensemble members onto a fixed, uniform reference mesh. On this mesh, all ensemble members have the same dimension and are defined onto the same spatial mesh, thus the assimilation of data can be performed using standard EnKF approaches. We have used the stochastic EnKF, but the approach can be easily adapted to the  
15 use of a square-root EnKF. After the analysis, the backward mapping returns the updated values to the individual, generally different and non-uniform, meshes of the respective ensemble members.

We consider two cases: a high resolution and a low resolution fixed uniform reference mesh. The essential property is that their resolution is determined by the remeshing tolerances  $\delta_1$  and  $\delta_2$ , such that the high- and low-resolution fixed reference meshes are the uniform meshes that bound, from above and below respectively, the resolution of all relevant adaptive meshes.  
20 While one can in principle use a fixed reference mesh of arbitrary resolution, our choice connects the resolution of the reference mesh to the given physical and computational constraints, reflected by the tolerances values in the model design. This in practice means that our reference mesh cell will contain at most, or at least, one node of the ensemble member mesh, in either the high- or low-resolution cases respectively. Hence, using this characterization, we can avoid excessive smoothing or interpolation at the mapping stages. Depending on whether the tolerances are divisors of the model domain dimension, the reference meshes  
25 can also be themselves valid meshes; nevertheless this condition is not required for the applicability of our approach.

We tested our modified EnKF using two 1D models, the Burgers and Kuramoto-Sivashinsky equations. A set of sensitivity tests are carried through some key model and DA setup parameters: the ensemble size, inflation factor and initial mesh size. We have considered two types of observations: Eulerian and Lagrangian. It is shown that, in general, a high resolution fixed reference mesh improves the estimate more than a low resolution fixed reference mesh. Whereas this might indeed be expected,  
30 our results also show that a low-resolution reference mesh affords a very high level of accuracy if the EnKF is properly tuned for the context. The use of a low-resolution fixed mesh has the obvious advantage of a lower computational burden, given that the size of the matrix operations to be implemented at the analysis step scales with the size of the fixed reference mesh.

We then examined the impact of assimilating Lagrangian observations compared with Eulerian ones and have seen, in the context of Burgers equation, that the former improves the solution as much as the latter. The effectiveness of Lagrangian

observers, despite being fewer in number than for the case of fixed, Eulerian observations, comes from their concentrating where their information is most useful, i.e., within the sharp single (shock-like) front of the Burgers solution.

In this work, we have focused on the design of the strategy and, for the sake of clarity, have focused only on updating the physical quantities, while the locations of the ensemble mesh nodes were left unchanged. A natural extension of this study is to subject both the model physical variables and the mesh locations to the assimilation of data. Both would then be updated at the analysis time, and this is currently under investigation.

This paper is part of a longer range research effort aimed at developing suitable EnKF strategies for a next generation 2D sea ice model of the Arctic Ocean, neXtSIM, which solves the model equations on a triangular mesh using finite element methods and a Lagrangian solver. The velocity-based mesh movement and remeshing procedure that we have built into our 1D model scenarios were formulated with the aim of mimicking those specific aspects of neXtSIM. In terms of our different types of observation, the impact of Eulerian and Lagrangian observational data was studied in light of observations gathered by satellites and drifting buoys respectively, which are two common observing tools for Arctic sea ice.

Such a 2D extension is, however, a non-trivial task for a number of fundamental reasons. First of all, given the triangular unstructured mesh in neXtSIM, we cannot straightforwardly define an ordering of the nodes on the adaptive moving mesh, as is done in the 1D case considered here. As a consequence, the determination of a fixed reference mesh might not be linked to the remeshing criteria in the same straightforward way. However, it is still possible to define a high-/low-resolution fixed reference mesh with respect to the mesh of neXtSIM, since the remeshing in neXtSIM is mainly used to keep the initial resolution throughout the integration. Secondly, the models considered in this study are proxies of continuous fluid flows whereas the rheology implemented in neXtSIM treats the sea ice as a solid brittle material which results in discontinuities when leads and ponds form due to fracturing and ice melting; the Gaussian assumptions implicit in the EnKF formulation need then to be reconsidered. Nevertheless, the methodology presented in this study, and the experiments herein, confronts some of the key technical issues of the 2D case. The current results in 1D are encouraging regarding the applicability of the proposed modification of the EnKF to adaptive moving mesh models in 2D, and the extension to 2D is the subject of the authors' current research.

*Author contributions.* The methodology has been developed by all of the authors. AA and CG have coded and run the experiments. The manuscript has been edited by all authors.

*Competing interests.* The authors declare that they have no conflict of interest.

*Acknowledgements.* The authors are thankful to Laurent Bertino for his comments and suggestions. AA, AC and PR have been funded by the project REDDA (#250711) of the Norwegian Research Council. AC and PR has also benefited funding from the Office of Naval Research project DASIM II (award N00014-18-1-2493). CG and CJ have been funded by the Office of Naval Research award N00014-18-1-2204.

## References

- Alharbi, A. and Naire, S.: An adaptive moving mesh method for thin film flow equations with surface tension, *Journal of Computational and Applied Mathematics*, 319, 365 – 384, <https://doi.org/10.1016/j.cam.2017.01.019>, 2017. [Cited on page 2]
- Anderson, J. L. and Anderson, S. L.: A Monte Carlo implementation of the nonlinear filtering problem to produce ensemble assimilations  
5 and forecasts, *Monthly Weather Review*, 127, 2741–2758, 1999. [Cited on page 16]
- Apte, A. and Jones, C.: The impact of nonlinearity in Lagrangian data assimilation, *Nonlinear Processes in Geophysics*, 20, 329–341, 2013. [Cited on page 27]
- Asch, M., Bocquet, M., and Nodet, M.: *Data Assimilation: Methods, Algorithms, and Applications*, Fundamentals of Algorithms, SIAM, Philadelphia, ISBN:978-1-611974-53-9, 2016. [Cited on page 2]
- 10 Babuška, I. and Aziz, A.: On the Angle Condition in the Finite Element Method, *SIAM Journal on Numerical Analysis*, 13, 214–226, <https://doi.org/10.1137/0713021>, 1976. [Cited on page 7]
- Baines, M. J., Hubbard, M. E., and Jimack, P. K.: Velocity-Based Moving Mesh Methods for Nonlinear Partial Differential Equations, *Communications in Computational Physics*, 10, 509–576, <https://doi.org/10.4208/cicp.201010.040511a>, 2011. [Cited on pages 2 and 6]
- Berger, M. J. and Oliger, J.: Adaptive mesh refinement for hyperbolic partial differential equations, *Journal of Computational Physics*, 53,  
15 484 – 512, [https://doi.org/10.1016/0021-9991\(84\)90073-1](https://doi.org/10.1016/0021-9991(84)90073-1), 1984. [Cited on page 2]
- Bishop, C. H., Etherton, B. J., and Majumdar, S. J.: Adaptive sampling with the ensemble transform Kalman filter. Part I: Theoretical aspects, *Mon. Weather Rev.*, 129, 420–436, 2001. [Cited on page 4]
- Bocquet, M. and Carrassi, A.: Four-dimensional ensemble variational data assimilation and the unstable subspace, *Tellus A*, 69, 1304–1304, 2017. [Cited on page 23]
- 20 Bonan, B., Nichols, N. K., Baines, M. J., and Partridge, D.: Data assimilation for moving mesh methods with an application to ice sheet modelling, *Nonlinear Processes in Geophysics*, 24, 515–534, <https://doi.org/10.5194/npg-24-515-2017>, 2017. [Cited on pages 3, 4, and 5]
- Bouillon, S. and Rampal, P.: Presentation of the dynamical core of neXtSIM, a new sea ice model, *Ocean Modelling*, 91, 23 – 37, <https://doi.org/10.1016/j.ocemod.2015.04.005>, 2015. [Cited on page 3]
- Bouillon, S., Rampal, P., and Olason, E.: Sea Ice Modelling and Forecasting, in: *New Frontiers in Operational Oceanography*, edited by Chassignet, E. P., Pascual, A., Tintoré, J., and (Eds.)n, J. V., chap. 15, pp. 423–444, GODAE OceanView, <https://doi.org/10.17125/gov2018>,  
25 2018. [Cited on page 3]
- Budhiraja, A., Friedlander, E., Guider, C., Jones, C., and Maclean, J.: Assimilating data into models, 2018. [Cited on page 2]
- Burgers, G., Jan van Leeuwen, P., and Evensen, G.: Analysis scheme in the ensemble Kalman filter, *Monthly weather review*, 126, 1719–1724, [https://doi.org/10.1175/1520-0493\(1998\)126<1719:ASITEK>2.0.CO;2](https://doi.org/10.1175/1520-0493(1998)126<1719:ASITEK>2.0.CO;2), 1998. [Cited on pages 10 and 15]
- 30 Burgers, J.: A Mathematical Model Illustrating the Theory of Turbulence, vol. 1 of *Advances in Applied Mechanics*, pp. 171 – 199, Elsevier, [https://doi.org/10.1016/S0065-2156\(08\)70100-5](https://doi.org/10.1016/S0065-2156(08)70100-5), 1948. [Cited on pages 16 and 18]
- Carrassi, A., Bocquet, M., Bertino, L., and Evensen, G.: Data assimilation in the geosciences: An overview of methods, issues, and perspectives, *Wiley Interdisciplinary Reviews: Climate Change*, 9, e535, <https://doi.org/10.1002/wcc.535>, 2018. [Cited on pages 2, 4, 11, and 16]
- Cohn, S. E.: Dynamics of short-term univariate forecast error covariances, *Monthly Weather Review*, 121, 3123–3149, 1993. [Cited on page 18]
- 35 Compère, G., Remacle, J. F., and Marchandise, E.: Transient Mesh Adaptivity with Large Rigid-Body Displacements, in: *Proceedings of the 17th International Meshing Roundtable*, edited by Garimella, R., pp. 213–230, Springer, Berlin, 2008. [Cited on page 3]

- Compère, G., Remacle, J.-F., Jansson, J., and Hoffman, J.: A mesh adaptation framework for dealing with large deforming meshes, *Int. J. Numer. Meth. Engng.*, 82, 843–867, <https://doi.org/10.1002/nme.2788>, 2009. [Cited on page 3]
- Dansereau, V., Weiss, J., Saramito, P., and Lattes, P.: A Maxwell elasto-brittle rheology for sea ice modelling, *The Cryosphere*, 10, 1339–1359, <https://doi.org/10.5194/tc-10-1339-2016>, 2016. [Cited on page 3]
- 5 Davies, D. R., Wilson, C. R., and Kramer, S. C.: Fluidity: A fully unstructured anisotropic adaptive mesh computational modeling framework for geodynamics, *Geochemistry, Geophysics, Geosystems*, 12, <https://doi.org/10.1029/2011GC003551>, 2011. [Cited on pages 2 and 4]
- Du, J., Zhu, J., Fang, F., Pain, C., and Navon, I.: Ensemble data assimilation applied to an adaptive mesh ocean model, *International Journal for Numerical Methods in Fluids*, 82, 997–1009, <https://doi.org/10.1002/flid.4247>, 2016. [Cited on pages 3, 4, 5, and 11]
- Evensen, G.: Sequential data assimilation with a nonlinear quasi-geostrophic model using Monte Carlo methods to forecast error statistics, *Journal of Geophysical Research: Oceans*, 99, 10 143–10 162, <https://doi.org/10.1029/94JC00572>, 1994. [Cited on page 10]
- 10 Evensen, G.: The ensemble Kalman filter: Theoretical formulation and practical implementation, *Ocean dynamics*, 53, 343–367, <https://doi.org/10.1007/s10236-003-0036-9>, 2003. [Cited on page 11]
- Evensen, G.: *Data Assimilation: The Ensemble Kalman Filter*, Springer-Verlag/Berlin/Heidelberg, second edn., ISBN:978-3-642-03711-5, 2009. [Cited on pages 2, 3, and 10]
- 15 Fang, F., Piggott, M., Pain, C., Gorman, G., and Goddard, A.: An adaptive mesh adjoint data assimilation method, *Ocean Modelling*, 15, 39 – 55, <https://doi.org/10.1016/j.ocemod.2006.02.002>, the Third International Workshop on Unstructured Mesh Numerical Modelling of Coastal, Shelf and Ocean Flows, 2006. [Cited on page 2]
- Farrell, P., Piggott, M., Pain, C., Gorman, G., and Wilson, C.: Conservative interpolation between unstructured meshes via supermesh construction, *Computer Methods in Applied Mechanics and Engineering*, 198, 2632–2642, <https://doi.org/10.1016/j.cma.2009.03.004>, 2009.
- 20 [Cited on page 4]
- Houtekamer, P. L. and Zhang, F.: Review of the Ensemble Kalman Filter for Atmospheric Data Assimilation, *Monthly Weather Review*, 144, 4489–4532, <https://doi.org/10.1175/MWR-D-15-0440.1>, 2016. [Cited on pages 2 and 10]
- Huang, W. and Russell, R. D.: *Adaptive moving mesh methods*, vol. 174, Springer Science & Business Media, ISBN:978-1-4419-7916-2, 2010. [Cited on pages 2, 6, and 7]
- 25 Huang, W., Zheng, L., and Zhan, X.: Adaptive moving mesh methods for simulating one-dimensional groundwater problems with sharp moving fronts, *International Journal for Numerical Methods in Engineering*, 54, 1579–1603, <https://doi.org/10.1002/nme.482>, 2002. [Cited on page 2]
- Jain, P. K., Mandli, K., Hoteit, I., Knio, O., and Dawson, C.: Dynamically adaptive data-driven simulation of extreme hydrological flows, *Ocean Modelling*, 122, 85–103, <https://doi.org/10.1016/j.ocemod.2017.12.004>, 2018. [Cited on page 4]
- 30 Kalman, R. E.: A new approach to linear filtering and prediction problems, *J. Fluid. Eng.*, 82, 35–45, 1960. [Cited on page 10]
- Kuznetsov, L., Ide, K., and Jones, C.: A method for assimilation of Lagrangian data, *Monthly Weather Review*, 131, 2247–2260, 2003. [Cited on page 27]
- Maddison, J., Marshall, D., Pain, C., and Piggott, M.: Accurate representation of geostrophic and hydrostatic balance in unstructured mesh finite element ocean modelling, *Ocean Modelling*, 39, 248 – 261, <https://doi.org/10.1016/j.ocemod.2011.04.009>, 2011. [Cited on page 4]
- 35 Marsan, D., Stern, H. L., Lindsay, R., and Weiss, J.: Scale dependence and localization of the deformation of Arctic sea ice, *Phys. Rev. Lett.*, 93, 178 501, 2004. [Cited on page 3]
- Nodet, M.: Variational assimilation of Lagrangian data in oceanography, *Inverse problems*, 22, 245, 2006. [Cited on page 27]



- Pain, C., Piggott, M., Goddard, A., Fang, F., Gorman, G., Marshall, D., Eaton, M., Power, P., and de Oliveira, C.: Three-dimensional unstructured mesh ocean modelling, *Ocean Modelling*, 10, 5 – 33, <https://doi.org/10.1016/j.ocemod.2004.07.005>, the Second International Workshop on Unstructured Mesh Numerical Modelling of Coastal, Shelf and Ocean Flows, 2005. [Cited on page 2]
- Pannekoucke, O., Bocquet, M., and Ménard, R.: Parametric covariance dynamics for the nonlinear diffusive Burgers equation, *Nonlinear Processes in Geophysics*, 25, 481–495, <https://doi.org/10.5194/npg-25-481-2018>, 2018. [Cited on page 18]
- Papageorgiou, D. T. and Smyrlis, Y. S.: The route to chaos for the Kuramoto-Sivashinsky equation, *Theoretical and Computational Fluid Dynamics*, 3, 15–42, <https://doi.org/10.1007/BF00271514>, 1991. [Cited on page 18]
- Partridge, D.: Numerical modelling of glaciers: moving meshes and data assimilation, Ph.D. thesis, University of Reading, 2013. [Cited on page 4]
- 10 Raanes, P. N., Bocquet, M., and Carrassi, A.: Adaptive covariance inflation in the ensemble Kalman filter by Gaussian scale mixtures, *Q J R Meteorol Soc.*, pp. 1–23, <https://doi.org/https://doi.org/10.1002/qj.3386>, 2019. [Cited on page 16]
- Rabatel, M., Rampal, P., Carrassi, A., Bertino, L., and Jones, C. K.: Impact of rheology on probabilistic forecasts of sea ice trajectories: application for search and rescue operations in the Arctic., *Cryosphere*, 12, <https://doi.org/10.5194/tc-12-935-2018>, 2018. [Cited on page 3]
- Rampal, P., Weiss, J., Marsan, D., Lindsay, R., and Stern, H.: Scaling properties of sea ice deformation from buoy dispersion analysis, *Journal of Geophysical Research: Oceans*, 113, <https://doi.org/10.1029/2007JC004143>, <http://dx.doi.org/10.1029/2007JC004143>, c03002, 2008. [Cited on page 3]
- 15 Rampal, P., Bouillon, S., Ólason, E., and Morlighem, M.: neXtSIM: a new Lagrangian sea ice model, *Cryosphere*, 10, <https://doi.org/10.5194/tc-10-1055-2016>, 2016. [Cited on pages 3, 5, and 7]
- Rampal, P., Dansereau, V., Olason, E., Bouillon, S., Williams, T., and Samaké, A.: On the multi-fractal scaling properties of sea ice deformation, *The Cryosphere Discussions*, 2019, 1–45, <https://doi.org/10.5194/tc-2018-290>, <https://www.the-cryosphere-discuss.net/tc-2018-290/>, 2019. [Cited on page 3]
- 20 Sakov, P. and Oke, P. R.: A deterministic formulation of the ensemble Kalman filter: an alternative to ensemble square root filters, *Tellus, Ser. A*, 60, 361–371, 2008. [Cited on page 10]
- Saksono, P. H., Dettmer, W. G., and Perić, D.: An adaptive remeshing strategy for flows with moving boundaries and fluid-structure interaction, *International Journal for Numerical Methods in Engineering*, 71, 1009–1050, <https://doi.org/10.1002/nme.1971>, <https://onlinelibrary.wiley.com/doi/abs/10.1002/nme.1971>, 2007. [Cited on page 7]
- 25 Slivinski, L., Spiller, E., Apte, A., and Sandstede, B.: A hybrid particle–ensemble Kalman filter for Lagrangian data assimilation, *Monthly Weather Review*, 143, 195–211, 2015. [Cited on page 27]
- Talagrand, O.: Assimilation of Observations, an Introduction (Special Issue — Data Assimilation in Meteorology and Oceanography: Theory and Practice), *J. Meteorol. Soc. Japan*, 75, 191–209, 1997. [Cited on page 4]
- 30 Verlaan, M. and Heemink, A. W.: Nonlinearity in Data Assimilation Applications: A Practical Method for Analysis, *Monthly Weather Review*, 129, 1578–1589, [https://doi.org/10.1175/1520-0493\(2001\)129<1578:NIDAAA>2.0.CO;2](https://doi.org/10.1175/1520-0493(2001)129<1578:NIDAAA>2.0.CO;2), 2001. [Cited on page 18]
- Weller, H., Ringler, T., Piggott, M., and Wood, N.: Challenges Facing Adaptive Mesh Modeling of the Atmosphere and Ocean, *Bulletin of the American Meteorological Society*, 91, 105–108, <https://doi.org/10.1175/2009BAMS2907.1>, <https://doi.org/10.1175/2009BAMS2907.1>, 2010. [Cited on page 2]
- 35
